# Supplementary material for: Transcriptomic and metabolomic analysis of autumn leaf color change in Fraxinus angustifolia
Source: PeerJ. 2023 May 12;11:e15319. doi: 10.7717/peerj.15319 (PMC10184661; doi:10.7717/peerj.15319)
Supplement: Supplemental Information 6 [file peerj-11-15319-s006.xlsx]

## Sheet: all.exp
Index	Molecular Weight (Da)	Formula	Compounds	Class I	Class II	CAS	Stage1-1	Stage1-2	Stage1-3	Stage2-1	Stage2-2	Stage2-3
pmb0782	85.089	C5H11N	Piperidine	Alkaloids	Alkaloids	110-89-4	517990	479010	528860	8354400	2069100	3887200
pme1974	88.016	C3H4O3	Pyruvic acid	Organic acids	Organic acids	127-17-3	12650	21587	15526	15611	16020	17672
pme2292	88.1	C4H12N2	Putrescine	Alkaloids	Phenolamine	110-60-1	248890	459500	330330	312420	447360	336200
Lmqp000873	100.016	C4H4O3	Succinic anhydride	Organic acids	Organic acids	108-30-5	244700	448150	247600	223150	356440	274860
mws4052	101.048	C4H7NO2	1-Aminocyclopropane-1-carboxylic acid	Others	Others	22059-21-8	137360	90058	111490	288320	116070	130190
HJAP103	103.063	C4H9NO2	2-Aminoisobutyric acid*	Amino acids and derivatives	Amino acids and derivatives	62-57-7	15280000	18327000	12356000	11894000	15611000	13822000
pme3011	103.063	C4H9NO2	γ-Aminobutyric acid*	Organic acids	Organic acids	1956-12-2	734310	843680	782040	2564500	1633500	1296900
pme3033	103.063	C4H9NO2	N,N-Dimethylglycine*	Amino acids and derivatives	Amino acids and derivatives	1118-68-9	751260	930320	807480	1881500	1411100	1060200
pmb0484	103.1	C5H13NO	Choline	Alkaloids	Alkaloids	62-49-7	30464000	33742000	24582000	24478000	31431000	26958000
pme1975	104.011	C3H4O4	Malonic acid	Organic acids	Organic acids	141-82-2	6160800	7145300	3418400	3618400	1806400	2121500
mws0576	104.047	C4H8O3	3-Hydroxybutyrate	Organic acids	Organic acids	300-85-6	5179100	6568500	2729000	2849600	1513600	1822000
pme0010	105.043	C3H7NO3	L-Serine	Amino acids and derivatives	Amino acids and derivatives	56-45-1	96112	109200	85553	107190	125470	96435
mws0255	111.043	C4H5N3O	Cytosine	Nucleotides and derivatives	Nucleotides and derivatives	71-30-7	245720	179680	205650	199740	205550	238530
pme2122	111.08	C5H9N3	Histamine	Amino acids and derivatives	Amino acids and derivatives	51-45-6	173500	150910	171560	171480	144250	178050
pme0257	112.027	C4H4N2O2	Uracil	Nucleotides and derivatives	Nucleotides and derivatives	66-22-8	289940	241000	246760	256370	258260	288310
pme0006	115.063	C5H9NO2	L-Proline	Amino acids and derivatives	Amino acids and derivatives	147-85-3	1987500	1737400	2227300	7352300	4363300	5093600
mws0376	116.011	C4H4O4	Fumaric acid	Organic acids	Organic acids	110-17-8	229070	272630	204230	330700	277410	258710
pmb1096	117.058	C8H7N	Indole	Alkaloids	Plumerane	120-72-9	5649.8	2456.2	3206.6	65675	28535	35219
mws0191	117.079	C5H11NO2	Betaine*	Alkaloids	Alkaloids	107-43-7	680640	366620	497890	1002700	554250	662550
mws0256	117.079	C5H11NO2	L-Valine*	Amino acids and derivatives	Amino acids and derivatives	72-18-4	919380	860110	1184300	12032000	2907300	4857500
pme1730	118.027	C4H6O4	D-Erythronolactone	Organic acids	Organic acids	15667-21-7	413910	508700	381610	391320	238110	264910
pme2923	118.027	C4H6O4	Acetoxyacetic acid*	Organic acids	Organic acids	13831-30-6	34620000	28184000	21614000	20815000	10499000	16224000
mws0192	118.027	C4H6O4	Succinic acid*	Organic acids	Organic acids	110-15-6	51959000	94508000	52455000	46418000	66734000	53393000
mws0470	118.027	C4H6O4	Methylmalonic acid*	Organic acids	Organic acids	516-05-2	604250	1374700	729940	703000	1084400	643470
pme3096	119.022	C3H5NO4	Aminomalonic acid	Organic acids	Organic acids	1068-84-4	1774800	3313500	1813200	1549400	2252500	1720100
mws0230	119.058	C4H9NO3	L-(-)-Threonine*	Amino acids and derivatives	Amino acids and derivatives	72-19-5	140760	119310	144830	962690	301390	410240
mws0671	119.058	C4H9NO3	L-Homoserine*	Organic acids	Organic acids	672-15-1	128220	136030	130370	1053400	287560	348590
pmp001287	119.073	C8H9N	N-Benzylmethylene isomethylamine	Alkaloids	Alkaloids	-	538610	962910	787010	871770	735230	850170
pma0134	120.042	C4H8O4	D(-)-Threose	Others	Saccharides and Alcohols	95-43-2	236910	1093800	2617200	90005	117720	47852
mws1203	120.058	C8H8O	Phenylacetaldehyde	Phenolic acids	Phenolic acids	122-78-1	302820	408840	275960	123400	101110	80374
pme0195	121.02	C3H7NO2S	L-Cysteine	Amino acids and derivatives	Amino acids and derivatives	52-90-4	22970	10560	13599	22397	4866.3	15262
mws0628	122.037	C7H6O2	4-Hydroxybenzaldehyde	Phenolic acids	Phenolic acids	123-08-0	336870	433020	521730	341050	284790	314150
mws0133	122.048	C6H6N2O	Nicotinamide	Others	Vitamin	98-92-0	619820	616480	593540	577510	551300	488240
pme0490	123.032	C6H5NO2	Nicotinic acid*	Others	Vitamin	59-67-6	59836	83166	41099	54257	89831	75394
pme1216	123.032	C6H5NO2	2-Picolinic acid*	Organic acids	Organic acids	98-98-6	49458	84178	37724	67645	65317	55379
pmp001086	126.032	C6H6O3	5-Hydroxymethylfurfural	Phenolic acids	Phenolic acids	67-47-0	73956	42517	58644	72367	64426	64287
Rfmb319	129.079	C6H11NO2	Pipecolic acid	Amino acids and derivatives	Amino acids and derivatives	4043-87-2	216160	164230	164220	407450	165350	196680
mws0227	131.095	C6H13NO2	L-Leucine*	Amino acids and derivatives	Amino acids and derivatives	61-90-5	1555300	1493900	1531300	21300000	5923500	9759500
mws1587	131.095	C6H13NO2	α-Aminocaproic acid*	Amino acids and derivatives	Amino acids and derivatives	327-57-1	1583100	2092300	2150500	16229000	8838900	13413000
mws0258	131.095	C6H13NO2	L-Isoleucine*	Amino acids and derivatives	Amino acids and derivatives	73-32-5	1553700	1903000	2066100	15245000	8712300	12782000
pme2679	131.095	C6H13NO2	L-Allo-Isoleucine*	Amino acids and derivatives	Amino acids and derivatives	1509-34-8	209970	224230	257400	3908400	765660	1713300
pme0274	131.095	C6H13NO2	6-Aminocaproic acid*	Organic acids	Organic acids	60-32-2	351200	438690	466780	7055100	1375500	3339800
mws0473	132.042	C5H8O4	2-Methylsuccinic acid*	Organic acids	Organic acids	498-21-5	284760	279620	255070	344870	215790	174090
pme0243	132.042	C5H8O4	Glutaric acid*	Organic acids	Organic acids	110-94-1	225760	238210	181540	442960	360400	457540
pmc0682	132.069	C8H8N2	4-Aminoindole	Alkaloids	Plumerane	5192-23-4	25856	63043	47435	43366	26122	62859
mws0341	132.079	C6H12O3	(S)-(-)-2-Hydroxyisocaproic acid	Organic acids	Organic acids	13748-90-8	10859	23196	12923	21277	18988	12743
mws0219	133.038	C4H7NO4	L-AsparticAcid	Amino acids and derivatives	Amino acids and derivatives	56-84-8	1029100	1469600	738180	1069900	756600	894780
mws1709	134.022	C4H6O5	Malic acid	Organic acids	Organic acids	636-61-3	3231200	3258400	3323000	3562200	4265500	3560400
pme0040	135.054	C5H5N5	Adenine	Nucleotides and derivatives	Nucleotides and derivatives	73-24-5	16465000	12400000	11925000	14173000	10407000	12028000
pmb0374	135.054	C5H5N5	Aminopurine	Alkaloids	Alkaloids	452-06-2	59752	85352	38483	63574	28864	30425
mws0889	136.037	C4H8O5	Threonate	Others	Saccharides and Alcohols	70753-61-6	950750	844260	810910	1943900	1603800	2051900
pme0033	136.039	C5H4N4O	Hypoxanthine	Nucleotides and derivatives	Nucleotides and derivatives	68-94-0	52997	51409	38977	47316	47595	44157
mws1078	137.048	C7H7NO2	Anthranilic Acid	Phenolic acids	Phenolic acids	118-92-3	69440	173210	70185	50183	99650	80765
mws1336	137.048	C7H7NO2	4-Aminobenzoic acid	Phenolic acids	Phenolic acids	150-13-0	980820	615370	866330	1334300	1817000	1439200
mws0146	137.048	C7H7NO2	Nicotinic Acid Methyl Ester(Methyl Nicotinate)	Alkaloids	Alkaloids	93-60-7	61318	52771	42917	73082	87928	104810
pma0948	137.084	C8H11NO	Hydroxyphenethylamine*	Others	Others	7568-93-6	2773400	12456000	28890000	1019700	1250200	737500
pme1002	137.084	C8H11NO	L-Tyramine*	Amino acids and derivatives	Amino acids and derivatives	51-67-2	8765200	34018000	75869000	3303400	4050800	2242900
mws0749	138.032	C7H6O3	4-Hydroxybenzoic acid*	Phenolic acids	Phenolic acids	99-96-7	259700	268060	242570	300640	152990	144860
Lmgn001670	138.032	C7H6O3	Salicylic acid*	Phenolic acids	Phenolic acids	69-72-7	550680	620650	686190	385010	375340	397330
Hmgn001653	138.032	C7H6O3	3,4-Dihydroxybenzaldehyde	Phenolic acids	Phenolic acids	139-85-5	196660	207240	197170	184930	114350	141430
mws2368	138.068	C8H10O2	Tyrosol	Phenolic acids	Phenolic acids	501-94-0	127070	136460	165210	72578	75249	79836
pme2828	139.027	C6H5NO3	4-Nitrophenol	Others	Others	100-02-7	37910000	35346000	32199000	44340000	66243000	59389000
pma2987	141.09	C6H11N3O	Histidinol	Others	Others	501-28-0	22026000	24569000	23605000	20133000	17864000	19971000
pme3207	142.027	C6H6O4	Trans,trans-Muconic acid	Organic acids	Organic acids	3588-17-8	309590	212850	139300	119190	306360	230720
pme2879	142.038	C5H6N2O3	5-Hydroxymethyluracil	Nucleotides and derivatives	Nucleotides and derivatives	4433-40-3	17194	24593	21773	18762	21751	18582
Rfmb318	144.102	C7H14NO2+	Proline betaine(ProBet)	Amino acids and derivatives	Amino acids and derivatives	1195-94-4	195820	216820	191250	236440	183750	265210
pme0295	145.074	C6H11NO3	4-Acetamidobutyric acid	Organic acids	Organic acids	3025-96-5	66039	63622	72996	349930	226660	196990
mws0567	145.085	C5H11N3O2	4-Guanidinobutyric acid	Organic acids	Organic acids	463-00-3	1510500	2158900	1624700	1556000	1649300	1779100
pme2380	146.022	C5H6O5	A-Ketoglutaric acid	Organic acids	Organic acids	328-50-7	707110	691520	406970	453880	394400	435140
Wmzn000227	146.058	C6H10O4	2,2-Dimethylsuccinic acid	Phenolic acids	Phenolic acids	-	12827	14829	9714.3	137300	13841	33846
pme0193	146.069	C5H10N2O3	L-Glutamine	Amino acids and derivatives	Amino acids and derivatives	56-85-9	2730900	2804300	3061600	26585000	4053700	6214500
pme0026	146.106	C6H14N2O2	L-(+)-Lysine	Amino acids and derivatives	Amino acids and derivatives	56-87-1	2496900	2829000	2609800	25196000	3318700	4863700
mws1050	147.053	C5H9NO4	O-Acetylserine*	Amino acids and derivatives	Amino acids and derivatives	5147-00-2	225640	624440	178350	140200	148070	99086
pme0014	147.053	C5H9NO4	L-Glutamic acid*	Amino acids and derivatives	Amino acids and derivatives	56-86-0	9361700	6693600	8088800	6088500	5829800	4675500
pmp001285	148.016	C8H4O3	Phthalic anhydride	Phenolic acids	Phenolic acids	85-44-9	984860	1018000	940400	814180	1018900	1025900
pmb2826	148.037	C5H8O5	Citramalate	Organic acids	Organic acids	2306-22-1	1235700	1645700	1225700	628480	1138100	618440
pme2987	148.052	C9H8O2	3,4-Dihydrocoumarin	Lignans and Coumarins	Coumarins	119-84-6	11741	21893	9886	5849.1	8813.5	7483.2
mws2213	148.052	C9H8O2	Cinnamic acid	Phenolic acids	Phenolic acids	140-10-3	44816	78507	33782	21703	40063	31186
pme3154	148.074	C6H12O4	(Rs)-Mevalonic acid	Organic acids	Organic acids	150-97-0	709610	746850	915050	623900	1132200	643010
Lmgp000796	149.048	C8H7NO2	p-hydroxymandelonitrile	Alkaloids	Alkaloids	-	223560	184130	199070	2997000	981800	1367100
pme1210	149.051	C5H11NO2S	L-Methionine	Amino acids and derivatives	Amino acids and derivatives	63-68-3	229980	216800	231480	3209900	1105000	1377800
mws0847	149.07	C6H7N5	1-Methyladenine	Nucleotides and derivatives	Nucleotides and derivatives	5142-22-3	59226	55394	45619	96263	63933	106840
mws0262	150.016	C4H6O6	L-(+)-Tartaric acid	Organic acids	Organic acids	87-69-4	46523	24651	55338	72775	71103	87186
mws1499	150.053	C5H10O5	D-(-)-Arabinose	Others	Saccharides and Alcohols	10323-20-3	601080	510300	595440	998900	843340	1150300
pme0183	151.049	C5H5N5O	2-Hydroxy-6-aminopurine	Nucleotides and derivatives	Nucleotides and derivatives	3373-53-3	42570	18128	24687	121310	46384	65179
pme1109	151.049	C5H5N5O	Guanine	Nucleotides and derivatives	Nucleotides and derivatives	73-40-5	204770	52965	78748	159540	117280	104770
pme0256	152.033	C5H4N4O2	Xanthine	Nucleotides and derivatives	Nucleotides and derivatives	69-89-6	23925	42746	20152	40103	25257	29159
mws0458	152.047	C8H8O3	Vanillin	Phenolic acids	Phenolic acids	121-33-5	451540	392140	456690	260900	244180	317020
mws0213	152.068	C5H12O5	Ribitol	Others	Saccharides and Alcohols	488-81-3	37911	30283	35510	38323	33517	44383
HJAP033	153.079	C8H11NO2	dopamine	Alkaloids	Phenolamine	-	10983	41464	524360	30430	19151	23686
mws0183	154.027	C7H6O4	Protocatechuic acid*	Phenolic acids	Phenolic acids	99-50-3	52848	128230	41044	656960	471900	709050
mws0639	154.027	C7H6O4	2,3-Dihydroxybenzoic Acid*	Organic acids	Organic acids	303-38-8	72699	146860	66470	823680	549010	887970
mws0885	154.027	C7H6O4	2,4-Dihydroxy benzoic acid	Phenolic acids	Phenolic acids	89-86-1	63835	137840	58966	848070	593330	856090
pmb3099	154.039	C4H11O4P	Diethyl phosphate	Organic acids	Organic acids	598-02-7	109760	128120	108620	106630	138880	133400
mws0254	155.069	C6H9N3O2	L-Histidine	Amino acids and derivatives	Amino acids and derivatives	71-00-1	22579	61899	29642	712950	58157	59321
mws0851	157.11	C8H15NaO2	Sodium Valproate	Organic acids	Organic acids	1069-66-5	18316000	21048000	17519000	13150000	18508000	14658000
mws0987	160.052	C10H8O2	6-MethylCoumarin	Lignans and Coumarins	Coumarins	92-48-8	16472	17943	10954	5624.3	5892	4776.8
pme3382	161.069	C6H11NO4	N-Acetylthreonine	Amino acids and derivatives	Amino acids and derivatives	17093-74-2	67930	42234	40706	92329	63773	80249
mws1346	161.069	C6H11NO4	DL-2-Aminoadipic acid	Alkaloids	Alkaloids	542-32-5	111510	69507	141240	943950	748760	908280
pme2761	162.016	C5H6O6	4-Hydroxy-2-oxoglutaric acid	Organic acids	Organic acids	1187-99-1	220540	120530	126850	298080	114820	127200
pme2914	162.053	C6H10O5	3-Hydroxy-3-methylpentane-1,5-dioic acid	Amino acids and derivatives	Amino acids and derivatives	503-49-1	555410	9	484420	1817800	1156300	1473600
pmf0440	162.068	C10H10O2	4-MethoxycinnaMaldehyde	Phenolic acids	Phenolic acids	1963-36-6	53333	57468	57677	65382	68864	69643
pme1419	163.067	C6H13NO2S	Methionine methyl ester	Amino acids and derivatives	Amino acids and derivatives	10332-17-9	13381	21034	11287	32509	24666	20048
pmb0142	164.047	C9H8O3	Caffeic aldehyde	Phenolic acids	Phenolic acids	141632-15-7	70581	68451	94430	115070	161140	143260
Lmmn001643	164.047	C9H8O3	2-Hydroxycinnamic acid	Organic acids	Organic acids	583-17-5	165980	172250	137600	192080	134290	240030
pme2529	164.068	C6H12O5	1,5-Anhydro-D-glucitol*	Others	Saccharides and Alcohols	154-58-5	202880	148940	177370	193560	168780	221390
pme2435	164.068	C6H12O5	L-Fucose*	Others	Saccharides and Alcohols	2438-80-4	182550	156250	152920	148170	157990	195840
Lmmn004032	164.12	C11H16O	Cis-Jasmone	Others	Others	488-10-8	388020	1192800	383250	268060	335830	153630
pme3083	165.043	C8H7NO3	2-(Formylamino)benzoic acid	Phenolic acids	Phenolic acids	3342-77-6	75544	59526	62229	60231	57611	106600
pme2617	165.046	C5H11NO3S	Methionine sulfoxide	Amino acids and derivatives	Amino acids and derivatives	62697-73-8	2525900	2855000	2808000	2721200	2360100	2521000
pme0021	165.079	C9H11NO2	L-Phenylalanine	Amino acids and derivatives	Amino acids and derivatives	63-91-2	11494000	20494000	17677000	19966000	16374000	18273000
pme0281	166.027	C8H6O4	Terephthalic acid	Phenolic acids	Phenolic acids	100-21-0	2740600	2108300	2187100	2044200	1664100	1727400
pmc0274	166.031	C6H6N4S	6-Methylmercaptopurine	Nucleotides and derivatives	Nucleotides and derivatives	50-66-8	658980	1317700	1049900	1076600	916250	1088100
mws0344	166.048	C5H10O6	D-Xylonic acid	Organic acids	Organic acids	526-91-0	4013400	3474000	4873800	5317900	4313000	7226900
Lmnp001551	166.063	C9H10O3	3-methoxy-4-hydroxy-acetophenone	Phenolic acids	Phenolic acids	-	464060	543530	1190600	100680	532070	279600
Lmdp003146	166.099	C10H14O2	Rhododendrol	Others	Others	501-96-2	155410	209310	131630	159830	183430	129980
mws2125	166.975	C3H4KO6P	Phosphoenolpyruvic acid	Organic acids	Organic acids	4265-07-0	21070	7041.7	18109	24122	25694	36860
mws0028	168.042	C8H8O4	Vanillic acid	Phenolic acids	Phenolic acids	121-34-6	18055	15165	13959	11890	9968.3	12785
pme2598	168.042	C8H8O4	3,4-Dihydroxybenzeneacetic acid	Phenolic acids	Phenolic acids	102-32-9	187980	78886	104190	117450	81822	105810
pme1383	169.074	C8H11NO3	Pyridoxine	Others	Vitamin	65-23-6	236700	335070	252130	197340	197040	181900
pme0181	169.085	C7H11N3O2	1-Methylhistidine	Amino acids and derivatives	Amino acids and derivatives	368-16-1	61068	56980	64838	76791	78650	72402
pme0124	172.085	C7H12N2O3	Glycyl-L-proline	Amino acids and derivatives	Amino acids and derivatives	704-15-4	19234	18134	14419	23840	23780	30967
pme0253	173.105	C8H15NO3	N-Acetyl-L-leucine	Amino acids and derivatives	Amino acids and derivatives	1188-21-2	5912.3	5950	3958.8	12602	7330.5	15268
pme3009	174.016	C6H6O6	Trans-Citridic acid*	Organic acids	Organic acids	4023-65-8	1210000	841030	712620	1038300	1885200	1803100
pme2550	174.016	C6H6O6	Cis-Aconitic acid*	Organic acids	Organic acids	585-84-2	45187	93944	84240	100820	62104	73242
mws0154	174.053	C7H10O5	Shikimic acid	Organic acids	Organic acids	138-59-0	128390	287870	227530	281170	159750	218370
mws0260	174.112	C6H14N4O2	L-(+)-Arginine	Amino acids and derivatives	Amino acids and derivatives	74-79-3	1130200	14932000	347580	469030	411830	316610
pme2559	175.048	C6H9NO5	N-Acetylaspartate	Amino acids and derivatives	Amino acids and derivatives	997-55-7	68774	51133	53972	111280	57320	128160
pme0008	175.096	C6H13N3O3	L-Citrulline	Amino acids and derivatives	Amino acids and derivatives	372-75-8	116930	243730	97160	218540	108170	123820
mws4175	176.032	C6H8O6	D-Glucurono-6,3-lactone	Others	Others	32449-92-6	17651	9039.5	20351	39462	32670	43392
mws1075	176.047	C10H8O3	7-Methoxycoumarin	Lignans and Coumarins	Coumarins	531-59-9	77817	101810	61159	54427	89769	70508
pmb3101	176.068	C7H12O5	2-Isopropylmalate	Organic acids	Organic acids	-	97860	113940	69654	113700	50433	42136
pme2836	177.079	C10H11NO2	5-Hydroxytryptophol	Alkaloids	Plumerane	154-02-9	19620	23948	31530	30435	60615	34758
mws1013	178.027	C9H6O4	Esculetin	Lignans and Coumarins	Coumarins	305-01-1	118140	145520	127190	69653	71032	51364
pme1021	178.048	C6H10O6	D-(+)-Glucono-1,5-lactone	Others	Saccharides and Alcohols	90-80-2	16463	27118	21895	24264	19034	32368
mws1195	178.063	C10H10O3	Methyl p-coumarate*	Phenolic acids	Phenolic acids	3943-97-3	29764	64514	23547	1832900	1255600	3240100
pmb2795	178.063	C10H10O3	4-Methoxycinnamic acid*	Phenolic acids	Phenolic acids	830-09-1	19737	45983	20120	1402600	986890	2663200
mws1200	178.063	C10H10O3	Trans-4-Hydroxycinnamic Acid Methyl Ester*	Phenolic acids	Phenolic acids	19367-38-5	49709	110210	43987	2719100	1826700	4634500
mws2212	180.042	C9H8O4	Caffeic acid	Phenolic acids	Phenolic acids	331-39-5	91076	146070	135220	292650	196710	247330
mws4170	180.063	C6H12O6	D-Glucose*	Others	Saccharides and Alcohols	14431-43-7	6316100	6247200	5471900	10075000	6985900	11411000
pme0516	180.063	C6H12O6	Inositol*	Others	Saccharides and Alcohols	87-89-8	2101000	2382300	2156500	2119100	2080200	2522000
mws0093	180.079	C10H12O3	Coniferyl alcohol	Phenolic acids	Phenolic acids	458-35-5	9	8532.2	5280	10372	5349.2	6851.3
mws0250	181.074	C9H11NO3	L-(-)-Tyrosine	Amino acids and derivatives	Amino acids and derivatives	60-18-4	2525300	3083600	1865000	7589100	6164900	7408100
Hmtn001288	182.058	C9H10O4	Methyl-(2,4-dihydroxyphenyl)acetate	Phenolic acids	Phenolic acids	-	25218	32156	26601	28682	20946	25539
mws1350	182.058	C9H10O4	Syringic Aldehyde	Phenolic acids	Phenolic acids	134-96-3	24473	22800	24547	12801	16652	19972
mws1155	182.079	C6H14O6	Mannitol*	Others	Saccharides and Alcohols	69-65-8	15668000	14026000	14978000	12888000	15972000	14794000
mws0214	182.079	C6H14O6	D-Sorbitol*	Others	Saccharides and Alcohols	50-70-4	14414000	11516000	18228000	13919000	15271000	12333000
pme2237	182.079	C6H14O6	Dulcitol*	Others	Saccharides and Alcohols	608-66-2	723340	511940	728850	686050	700830	572970
pme2596	183.053	C8H9NO4	4-Pyridoxic acid	Others	Vitamin	82-82-6	544690	475140	641540	638450	772240	765630
Lmtn002671	184.037	C8H8O5	3,4-Dihydroxy-5-methoxybenzoic acid	Phenolic acids	Phenolic acids	3934-84-7	9	9	9	9565.3	5491.9	7273.6
HJN037	184.037	C8H8O5	4-methoxy-3,5-dihydroxybenzoic acid	Phenolic acids	Phenolic acids	-	9	3272.3	1188.1	14933	5396.2	14883
Lmrj001341	184.085	C8H12N2O3	Cyclo(Ser-Pro)	Amino acids and derivatives	Amino acids and derivatives	-	8368.5	7646.8	11712	14797	14827	15908
mws0752	186.162	C11H22O2	Undecylic Acid	Lipids	Free fatty acids	112-37-8	520670	658610	578200	404840	478510	468140
Hmmp001310	187.063	C11H9NO2	3-Indoleacrylic acid	Alkaloids	Alkaloids	1204-06-4	1418100	1259900	1221900	22623000	7712900	14718000
pme0137	188.08	C7H12N2O4	N-α-Acetyl-L-glutamine	Amino acids and derivatives	Amino acids and derivatives	2490-97-3	865080	674930	792460	916910	987340	734890
mws0237	188.105	C9H16O4	Anchoic Acid	Organic acids	Organic acids	123-99-9	50349	42204	29560	36990	40884	57059
pme0122	188.116	C8H16N2O3	N6-Acetyl-L-lysine	Amino acids and derivatives	Amino acids and derivatives	692-04-6	22540	16796	18184	34230	27757	34798
pme0075	189.064	C7H11NO5	N-Acetyl-L-glutamic acid	Amino acids and derivatives	Amino acids and derivatives	1188-37-0	665200	751850	702980	362250	626370	322520
pme0278	190.095	C7H14N2O4	2,6-Diaminooimelic acid	Amino acids and derivatives	Amino acids and derivatives	583-93-7	24498	24090	26138	52362	34238	27662
mws0281	192.027	C6H8O7	Citric Acid	Organic acids	Organic acids	77-92-9	7437100	4519300	5972400	2778200	2172100	3195100
Hmcp002123	192.042	C10H8O4	6-Hydroxy-7-methoxycoumarin	Lignans and Coumarins	Coumarins	776-86-3	63364	25350	52878	39744	20982	38145
mws0277	192.063	C7H12O6	Quinic Acid	Organic acids	Organic acids	77-95-2	3183000	2014900	2745800	2149100	1275100	1964900
pme3705	194.043	C6H10O7	D-Glucoronic acid	Others	Saccharides and Alcohols	1700908	126540	136570	137600	340790	201320	338990
Xmgn006542	194.058	C10H10O4	Dimethyl Phthalate*	Others	Others	131-11-3	70260	95146	88110	813730	467120	712920
Lmdn003756	194.058	C10H10O4	Methyl caffeate*	Phenolic acids	Phenolic acids	3843-74-1	27094	22063	14971	38735	21873	48503
pme0422	194.058	C10H10O4	Isoferulic Acid*	Phenolic acids	Phenolic acids	537-73-5	348390	281330	404250	346890	416260	425590
mws0014	194.058	C10H10O4	Ferulic acid*	Phenolic acids	Phenolic acids	537-98-4	178600	157980	189530	199820	224060	268760
pme0534	196.058	C6H12O7	Gluconic acid	Others	Saccharides and Alcohols	526-95-4	1664000	1412600	1789400	2057300	1761300	2338400
pmb2640	200.178	C12H24O2	Lauric acid	Lipids	Free fatty acids	143-07-7	9926.2	12998	9660	5063.8	6838.9	4269.4
mws5037	202.132	C9H18N2O3	Alanylleucine	Amino acids and derivatives	Amino acids and derivatives	1999-42-4	24075	49264	24864	59741	62837	42015
mws0018	202.216	C10H26N4	Spermine	Alkaloids	Phenolamine	71-44-3	24340000	30396000	25725000	29892000	28607000	27339000
mws0282	204.09	C11H12N2O2	L-Tryptophan	Amino acids and derivatives	Amino acids and derivatives	73-22-3	214730	118980	129380	3307400	999890	1901800
pmb0818	205.074	C11H11NO3	Methoxyindoleacetic acid	Alkaloids	Plumerane	3471-31-6	49363	45772	39448	719190	247230	483750
Lmln010063	206.167	C14H22O	2,6-Di-t-butylphenol	Phenolic acids	Phenolic acids	128-39-2	610130	578470	603260	566830	585670	572250
Lmbp002962	208.037	C10H8O5	Isofraxetin	Lignans and Coumarins	Coumarins	50656-75-2	9144800	10625000	13078000	7790100	8288200	8852200
pmb2620	208.074	C11H12O4	3,4-Dimethoxycinnamic acid	Phenolic acids	Phenolic acids	14737-89-4	36433	46122	60886	391640	200200	471280
mws1212	208.074	C11H12O4	Methyl ferulate	Phenolic acids	Phenolic acids	149567	69013	75370	128750	936580	530770	1212000
Hmcn000192	210.074	C7H14O7	Sedoheptulose	Others	Saccharides and Alcohols	3019-74-7	1614900	1289700	1499900	2065400	1619700	2408800
pme1654	210.126	C12H18O3	Jasmonic acid	Organic acids	Organic acids	77026-92-7	417280	153560	276110	138070	71416	31287
pmb0128	212.178	C13H24O2	δ-Tridecalactone	Lipids	Glycerol ester	7370-92-5	68708	22589	69837	19676	15641	4368.6
pme0170	216.122	C8H16N4O3	N-α-Acetyl-L-arginine	Amino acids and derivatives	Amino acids and derivatives	155-84-0	51862	31764	49153	204090	135180	186300
pme2566	218.09	C8H14N2O5	(5-L-Glutamyl)-L-amino acid	Amino acids and derivatives	Amino acids and derivatives	5875-41-2	45564	21680	26797	91395	70045	150380
mws1337	219.111	C9H17NO5	D-Pantothenic Acid	Others	Vitamin	79-83-4	514720	796990	459770	820590	843730	984660
pme1228	220.085	C11H12N2O3	5-Hydroxy-L-tryptophan	Amino acids and derivatives	Amino acids and derivatives	56-69-9	41268	35423	40593	79846	82164	88358
mws2608	221.09	C8H15NO6	N-Acetyl-D-galactosamine*	Others	Others	1811-31-0	983270	1074300	1010700	866300	896050	1053200
pme2755	221.09	C8H15NO6	N-Acetyl-D-glucosamine	Others	Saccharides and Alcohols	7512-17-6	1098800	996880	999960	949720	991640	831120
pmp000284	222.053	C11H10O5	Fraxidin*	Lignans and Coumarins	Coumarins	525-21-3	10110	10461	19405	29025	8549.3	39973
mws1639	222.053	C11H10O5	Isofraxidin*	Lignans and Coumarins	Coumarins	486-21-5	30607	28768	45532	77479	19027	95701
Lmjp002764	222.053	C11H10O5	Umckalin (7-hydroxy-5,6-dimethoxycoumarin)	Lignans and Coumarins	Coumarins	43053-62-9	2093900	3111400	3183600	1710200	1865700	1794700
mws5042	222.1	C11H14N2O3	Glycylphenylalanine	Amino acids and derivatives	Amino acids and derivatives	721-66-4	9811.4	19501	7321.4	27098	20896	33410
mws0520	223.084	C11H13NO4	N-Acetyl-L-tyrosine	Amino acids and derivatives	Amino acids and derivatives	537-55-3	15757	25361	24408	21081	19421	19037
pmp000452	224.141	C13H20O3	Annuionone D	Others	Others	-	2402600	1589500	2179000	3517500	3223600	2760400
pmb2643	226.193	C14H26O2	Myristoleic acid	Lipids	Free fatty acids	544-64-9	24256	24024	28819	6004.6	6743.8	3111.7
pme1194	227.091	C9H13N3O4	Deoxycytidine	Nucleotides and derivatives	Nucleotides and derivatives	951-77-9	48033	43636	41418	24783	37349	40698
mws0119	228.209	C14H28O2	Myristic Acid	Lipids	Free fatty acids	544-63-8	33651000	34931000	38372000	19354000	19615000	14590000
Lmhp001670	230.163	C11H22N2O3	Val-Leu	Amino acids and derivatives	Amino acids and derivatives	-	15046	26785	6445.6	42294	22030	30540
pmb0962	234.158	C10H22N2O4	Lysine butyrate	Amino acids and derivatives	Amino acids and derivatives	80407-71-2	12731	8401.9	10421	141220	14788	30315
mws0221	240.024	C6H12N2O4S2	L-(-)-Cystine	Amino acids and derivatives	Amino acids and derivatives	56-89-3	41527	28324	24281	45718	51903	57412
pme2827	240.245	C16H32O	Palmitaldehyde	Others	Others	629-80-1	4113000	4114800	3936700	4123400	4582800	4274200
pme0264	242.09	C10H14N2O5	Thymidine	Nucleotides and derivatives	Nucleotides and derivatives	50-89-5	10090	8001	5804.6	11658	6630.1	4901.8
mws0359	242.225	C15H30O2	Pentadecanoic Acid	Lipids	Free fatty acids	1002-84-2	521860	634880	834070	221410	212920	122250
pme3732	243.086	C9H13N3O5	Cytidine	Nucleotides and derivatives	Nucleotides and derivatives	65-46-3	838110	678740	759650	533360	519330	633850
mws0248	244.07	C9H12N2O6	Uridine*	Nucleotides and derivatives	Nucleotides and derivatives	58-96-8	200430	140470	100610	450500	240380	275500
mws0976	244.07	C9H12N2O6	β-Pseudouridine*	Nucleotides and derivatives	Nucleotides and derivatives	1445-07-4	12616	18642	9241.5	40655	28068	59980
Lmhp002031	244.179	C12H24N2O3	Leu- Leu	Amino acids and derivatives	Amino acids and derivatives	-	16640	14162	19388	32180	26494	34564
pmb2591	246.1	C13H14N2O3	Acetyltryptophan	Amino acids and derivatives	Amino acids and derivatives	138798	50842	48053	43824	41229	44680	40491
pme3961	251.102	C10H13N5O3	Deoxyadenosine	Nucleotides and derivatives	Nucleotides and derivatives	958-09-8	28119	35326	11847	9424.4	6669.9	9902.4
mws0361	254.225	C16H30O2	Palmitoleic Acid	Lipids	Free fatty acids	373-49-9	23113	21476	31345	7307.2	7474.5	4030.1
pma3101	256.082	C11H14NO6+	Nicotinate D-ribonucleoside	Others	Vitamin	17720-18-2	3834100	1921200	4671900	6911200	5778700	7159700
pmn001578	256.24	C16H32O2	Palmitic acid	Lipids	Free fatty acids	21096	26930000	30423000	30902000	36147000	30454000	30319000
mws1090	260.03	C6H13O9P	Glucose-1-phosphate*	Others	Saccharides and Alcohols	59-56-3	285360	189870	260770	394800	257510	334440
pme3313	260.03	C6H13O9P	D-Fructose 6-phosphate*	Others	Saccharides and Alcohols	643-13-0	113200	77825	87040	147350	95685	98338
Lmhp002001	264.147	C14H20N2O3	Val-Phe	Amino acids and derivatives	Amino acids and derivatives	-	10441	36254	10750	30647	20019	25033
Hmsn000210	266.225	C17H30O2	Methyl 7,10-hexadecadienoate	Lipids	Free fatty acids	-	15515000	16344000	16236000	16836000	18406000	16792000
pme0230	267.097	C10H13N5O4	Adenosine*	Nucleotides and derivatives	Nucleotides and derivatives	58-61-7	28393000	35030000	19436000	23860000	15667000	15716000
pme1184	267.097	C10H13N5O4	Deoxyguanosine*	Nucleotides and derivatives	Nucleotides and derivatives	961-07-9	64638	97908	61753	111130	171410	153640
mws1060	268.081	C10H12N4O5	9-(β-D-Arabinofuranosyl)hypoxanthine	Nucleotides and derivatives	Nucleotides and derivatives	7013-16-3	494750	690450	361230	170370	277470	255880
mws0383	268.24	C17H32O2	Cis-10-Heptadecenoic Acid	Lipids	Free fatty acids	29743-97-3	2455500	2781200	3804200	900120	867250	524380
Lmmn003323	272.235	C16H32O3	2-hydroxyhexadecanoic acid	Organic acids	Organic acids	764-67-0	218380	220920	212100	175910	133290	179880
pme3285	274.084	C15H14O5	Afzelechin(3,5,7,4'-Tetrahydroxyflavan)	Flavonoids	Flavanols	2545-00-8	613760	666160	745140	712490	810690	631870
pmb0034	276.096	C10H16N2O7	Glu-Glu	Amino acids and derivatives	Amino acids and derivatives	3929-61-1	39321	19086	21166	56832	62586	49556
Lmrj002793	276.111	C14H16N2O4	Cyclo(Phe-Glu)	Amino acids and derivatives	Amino acids and derivatives	-	20862	6731.5	9165	12458	12992	11914
pme1712	276.132	C11H20N2O6	L-Saccharopine	Amino acids and derivatives	Amino acids and derivatives	997-68-2	6328.9	9226.2	4971.2	40087	36695	57101
mws1038	278.13	C11H22N2O4S	(R)-Pantetheine	Others	Others	496-65-1	11085	21530	14437	45488	19114	36446
Lmlp012720	278.152	C16H22O4	Dibutyl phthalate	Phenolic acids	Phenolic acids	84-74-2	16950000	18242000	16276000	14629000	17553000	18172000
mws0366	278.225	C18H30O2	γ-Linolenic Acid*	Lipids	Free fatty acids	506-26-3	15367000	11172000	10396000	12933000	8985000	12363000
mws0367	278.225	C18H30O2	α-Linolenic Acid*	Lipids	Free fatty acids	463-40-1	15816000	11711000	11672000	13071000	9051700	12928000
pmb0889	278.225	C18H30O2	Punicic acid	Lipids	Free fatty acids	544-72-9	573590	445640	543620	232650	174240	173640
Lmhn002926	280.058	C13H12O7	p-coumaroylmalic acid	Phenolic acids	Phenolic acids	-	1282900	1598100	1497600	1319900	1575200	1528100
mws0629	280.106	C13H16N2O5	Asp-phe	Amino acids and derivatives	Amino acids and derivatives	13433-09-5	35927	41718	28402	36976	29969	20519
YC512118	281.272	C18H35NO	Octadecenoic amide	Others	Others	-	47549	83791	55205	139580	97776	58516
mws0396	282.256	C18H34O2	Elaidic Acid	Lipids	Free fatty acids	112-79-8	7270700	8214400	8433000	4039500	3091000	5127300
mws2623	282.256	C18H34O2	11-Octadecanoic acid(Vaccenic acid)	Lipids	Free fatty acids	506-17-2	2179600	2540600	2665600	1253600	1006000	1584500
pme1178	283.092	C10H13N5O5	Guanosine	Nucleotides and derivatives	Nucleotides and derivatives	118-00-3	3679900	4081800	3246600	2488000	2116200	3522000
mws0918	284.068	C16H12O5	Prunetin	Flavonoids	Isoflavones	552-59-0	24927	39674	20657	8112.6	3516.3	4646.1
mws0668	284.076	C10H12N4O6	Xanthosine	Nucleotides and derivatives	Nucleotides and derivatives	146-80-5	259190	513730	146640	148300	128170	169760
mws1489	284.272	C18H36O2	Stearic Acid	Lipids	Free fatty acids	21128	23136000	25854000	30827000	26057000	32507000	28133000
pmb2657	290.123	C10H18N4O6	Argininosuccinic acid	Organic acids	Organic acids	2387-71-5	18548	15198	19025	26018	8052	12380
pmb0885	290.188	C18H26O3	4-oxo-9Z,11Z,13E,15E-octadecatetraenoic acid	Lipids	Glycerol ester	-	71738	63923	55873	56846	55433	69101
HmLn007772	294.183	C17H26O4	Nordihydrocapsiate	Phenolic acids	Phenolic acids	220012-53-3	897980	1024300	746210	669340	930400	706100
pmb2786	294.219	C18H30O3	9-HOTrE	Lipids	Free fatty acids	89886-42-0	239540	196750	152270	350740	128130	69859
pmb2792	294.219	C18H30O3	13-HOTrE(r)	Lipids	Free fatty acids	74784-20-6	34776	38736	35008	36132	40150	37463
Lmqp000329	295.057	C8H14N3O7P	5-aminoimidazole ribonucleotide	Nucleotides and derivatives	Nucleotides and derivatives	25635-88-5	41102	29724	25989	34427	25680	45791
Rfmb090	296.235	C18H32O3	13-Hydroxy-9,11-octadecadienoic acid*	Lipids	Free fatty acids	5204-88-6	365840	225090	352060	101300	81415	76540
pme1474	297.09	C11H15N5O3S	5'-Deoxy-5'-(methylthio)adenosine	Nucleotides and derivatives	Nucleotides and derivatives	2457-80-9	4344200	7356000	4521300	4579200	2998200	4471300
pmb0197	297.107	C11H15N5O5	N2-methylguanosine	Nucleotides and derivatives	Nucleotides and derivatives	2140-77-4	229130	312990	290010	233130	349760	473080
mws0724	299.087	C10H13N5O6	8-Hydroxyguanosine	Nucleotides and derivatives	Nucleotides and derivatives	3868-31-3	5878.7	3733.4	5333.4	3626.4	5583.3	6178.5
Zmhn001358	300.085	C13H16O8	4-O-glucosyl-4-hydroxybenzoic acid*	Phenolic acids	Phenolic acids	-	243590	142710	174590	284130	431070	361480
Zmhn001926	300.085	C13H16O8	Salicylic acid O-glycoside*	Phenolic acids	Phenolic acids	-	4787800	4572200	5718100	5196400	8409200	6390700
Zmxn001997	300.085	C13H16O8	Isosalicylic acid O-glycoside*	Phenolic acids	Phenolic acids	-	241130	173740	175200	310270	439920	382010
mws2367	300.121	C14H20O7	Salidroside	Phenolic acids	Phenolic acids	10338-51-9	3663700	6213000	6567300	3776500	2889100	4619500
Hmyn001360	300.136	C18H20O4	Doitungbiphenyl A	Others	Others	-	4946400	7976100	7966200	4652900	4861000	5748500
Lmqn008288	300.266	C18H36O3	3-hydroxy-stearic acid	Lipids	Free fatty acids	17773-30-7	211780	297050	199060	194200	216600	218020
Hmyp002315	302.043	C15H10O7	3,5,7,4'--Tetrahydroxy-Coumaronochromone	Others	Others	-	208600	175640	203710	561620	499920	421950
pme2954	302.043	C15H10O7	Quercetin	Flavonoids	Flavonols	117-39-5	213800	453370	377760	324250	288280	351310
Zmhn000892	302.1	C13H18O8	4-O-glucosyl-3,4-dihydroxybenzyl alcohol	Phenolic acids	Phenolic acids	-	689420	476890	641870	826790	1102400	912130
mws1375	303.143	C12H21N3O6	Nicotianamine	Amino acids and derivatives	Amino acids and derivatives	34441-14-0	15541	31363	26430	17535	29217	29067
pmb2601	308.09	C15H16O7	7-hydroxycoumarin-O-rhamnoside	Lignans and Coumarins	Coumarins	-	1405100	975970	1202100	2977400	2865700	2171500
pmn001610	308.272	C20H36O2	Eicosadienoic acid	Lipids	Free fatty acids	5598-38-9	32883	36014	42054	16775	15855	13466
pmb2857	309.106	C11H19NO9	L-Glutamic acid O-glycoside	Amino acids and derivatives	Amino acids and derivatives	-	22643	29301	15462	20865	14514	43655
Lmhn003074	310.069	C14H14O8	feruloylmalic acid	Phenolic acids	Phenolic acids	-	3371200	1802500	2686800	3056300	2774900	3301100
pmb2791	310.214	C18H30O4	9-HpOTrE	Lipids	Glycerol ester	111004-08-1	152540	163220	64937	17909	16203	12152
pmn001606	310.287	C20H38O2	Eicosenoic acid	Lipids	Free fatty acids	26764-41-0	107880	108730	107850	49083	55049	32150
Hmtn001358	311.101	C14H17NO7	2-(D-Glucopyranosyloxy)-4-hydroxybenzeneacetonitrile	Alkaloids	Alkaloids	-	298570	150030	259710	287610	135890	315370
Lmtp001399	311.101	C14H17NO7	5,6-Dihydroxyindole-5-O-β-glucoside	Others	Others	-	153940	274800	241880	233940	338020	266550
pme3967	311.123	C12H17N5O5	2-(Dimethylamino)guanosine	Nucleotides and derivatives	Nucleotides and derivatives	2140-67-2	320770	667190	426460	1196700	995820	1961800
mws1174	314.079	C17H14O6	3-O-Acetylpinobanksin*	Flavonoids	Dihydroflavonol	52117-69-8	195740	239970	143710	22276	38118	56648
pmp000002	314.079	C17H14O6	Ladanein*	Flavonoids	Flavonoid	10176-71-3	64293	104710	68809	28538	15351	6069.1
Rfmb089	314.246	C18H34O4	9,10-Dihydroxy-12-octadecenoic acid	Lipids	Free fatty acids	263399-34-4	110410	216510	56066	39108	49583	35089
Lmdp003808	316.058	C16H12O7	Azaleatin (5-O-Methylquercetin)	Flavonoids	Flavonols	529-51-1	211650	184270	212020	635230	850240	945620
pmn001367	316.079	C13H16O9	Protocatechuic acid-4-glucoside*	Phenolic acids	Phenolic acids	-	4271300	2442800	2672900	3917400	2986000	4529200
pmb2871	316.079	C13H16O9	2,5-Dihydroxy benzoic acid O-hexside*	Phenolic acids	Phenolic acids	-	9361600	11295000	6640100	9500400	8194500	11927000
pmn001553	316.116	C14H20O8	Cimidahurinine*	Phenolic acids	Phenolic acids	142542-89-0	2334500	2051700	2400700	3649800	3918200	3877800
Hmtn001120	316.116	C14H20O8	5-(2-Hydroxyethyl)-2-O-glucosylohenol*	Phenolic acids	Phenolic acids	-	2770100	2405100	2540900	3881400	3719400	4262500
pme3459	316.204	C20H28O3	Caffeyl alcohol	Phenolic acids	Phenolic acids	469-83-0	32006	28687	28115	30051	24464	41452
pmb3075	320.09	C16H16O7	3-O-p-Coumaroylshikimic acid	Phenolic acids	Phenolic acids	-	35924	54194	13909	23799	16339	27643
Lmbp003825	324.085	C15H16O8	Skimmin	Lignans and Coumarins	Coumarins	93-39-0	11851000	21530000	18760000	18589000	21172000	19448000
mws0983	325.298	C20H39NO2	N-Oleoylethanolamine	Others	Others	111-58-0	47042	108400	42419	55295	97925	261340
HmLn002835	326.1	C15H18O8	Cis-p-coumaric acid 4-O-glucoside*	Others	Others	-	4337300	11293000	4211100	3582800	4536100	2708600
pmn001419	326.1	C15H18O8	1-O-[(E)-p-Cumaroyl]-β-D-glucopyranose*	Phenolic acids	Phenolic acids	-	7846000	20450000	7938200	5642600	8966200	5273500
Lmtn002233	328.116	C15H20O8	androsin	Others	Others	531-28-2	3031100	5233000	3383800	5061700	6189500	3926200
pmn001691	328.225	C18H32O5	9,12,13-Trihyroxy-10,15-octadecadienoic acid	Lipids	Free fatty acids	-	233460	147600	245880	45295	35543	10856
mws0884	329.053	C10H12N5O6P	Cyclic AMP	Nucleotides and derivatives	Nucleotides and derivatives	60-92-4	31685	40282	20960	17740	18750	13240
Lmtn002565	330.095	C14H18O9	1'-O-vanilloyl-β-D-glucoside	Phenolic acids	Phenolic acids	-	82410	90704	83345	114920	127850	148150
pmn001517	330.131	C15H22O8	3,4,5-Trimethoxyphenyl-β-D-Glucopyranoside	Phenolic acids	Phenolic acids	-	17454000	17959000	15677000	17866000	19834000	20415000
pmn001694	330.241	C18H34O5	9,10,13-Trihyroxy-11-octadecadienoic acid	Lipids	Free fatty acids	-	71224	43272	71973	32102	19660	14141
pmp001284	330.277	C19H38O4	Monopalmitin	Lipids	Glycerol ester	542-44-9	59424	56059	49657	50677	52474	40692
pme3184	331.068	C10H14N5O6P	2'-Deoxyadenosine-5'-monophosphate	Nucleotides and derivatives	Nucleotides and derivatives	653-63-4	2840900	2043000	2895900	4313600	4126700	4775100
pmb0789	331.127	C14H21NO8	Pyridoxine-5'-O-glucoside	Others	Vitamin	-	8054600	6598900	8857900	13773000	13720000	16498000
pmc0066	332.052	C10H13N4O7P	2'-Deoxyinosine-5'-monophosphate	Nucleotides and derivatives	Nucleotides and derivatives	3393-18-8	437210	215550	239020	145340	248750	224980
Zmhn001703	332.074	C13H16O10	5-O-Galloyl hamamelose*	Phenolic acids	Phenolic acids	-	2788100	1938000	2298900	7915700	10685000	9330500
HmLn000659	332.074	C13H16O10	3-O-Galloyl-β-D-glucose*	Tannins	Tannin	-	2632700	1842800	2595600	8263700	11108000	8604300
mws0675	334.057	C11H15N2O8P	β-Nicotinamide mononucleotide	Nucleotides and derivatives	Nucleotides and derivatives	1094-61-7	30806	8376	32716	44837	20631	44848
Hmln002806	336.085	C16H16O8	3-O-Caffeoylshikimic acid	Phenolic acids	Phenolic acids	180981-12-8	564820	1856000	726110	171990	324510	177190
pmb4777	338.1	C16H18O8	4-Hydroxy-7-methoxycoumarin-β-rhamnoside	Lignans and Coumarins	Coumarins	-	538120	247130	329170	525820	522420	572970
pmn001421	338.1	C16H18O8	3-O-(E)-p-Coumaroyl quinic acid*	Phenolic acids	Phenolic acids	87099-71-6	288650	922910	468740	688660	707420	654370
pmp000231	338.1	C16H18O8	Trans-3-O-p-coumaric quinic acid*	Phenolic acids	Phenolic acids	-	7214200	19143000	10744000	11053000	11995000	8551700
pmp000232	338.1	C16H18O8	Cis-3-p-coumaric quinic acid*	Phenolic acids	Phenolic acids	-	8552600	10867000	7680900	2389000	3405300	2332400
mws1015	340.079	C15H16O9	Esculin(6,7-DihydroxyCoumarin-6-glucoside)*	Lignans and Coumarins	Coumarins	531-75-9	1989800	3794000	3169600	1362100	2385600	1540300
Lmbn001162	340.079	C15H16O9	esculetin-glucoside*	Lignans and Coumarins	Coumarins	-	1813100	3546000	2681500	1302700	2730600	1721800
mws5039	340.079	C15H16O9	Esculin Hydrate*	Lignans and Coumarins	Coumarins	66778-17-4	4455600	11162000	8607000	3283900	4678800	3276400
pmn001420	342.095	C15H18O9	1-O-[(E)-Caffeoyl]-β-D-glucopyranose	Phenolic acids	Phenolic acids	-	3175000	3191700	3690300	3088700	3962300	3059000
mws0264	342.116	C12H22O11	D-(+)-TrehaloseAnhydrous*	Others	Saccharides and Alcohols	99-20-7	7108100	5933400	7667700	6918600	6675900	5647800
mws1080	342.116	C12H22O11	Galactinol*	Others	Saccharides and Alcohols	3687-64-7	32007000	25722000	30432000	28638000	29862000	28558000
pme0519	342.116	C12H22O11	D-(+)-Sucrose*	Others	Saccharides and Alcohols	57-50-1	19680000	18322000	21145000	17735000	18685000	16961000
mws5038	342.116	C12H22O11	Isomaltulose*	Others	Saccharides and Alcohols	13718-94-0	6569800	8370800	9358900	7160200	7681700	8806300
mws1333	342.116	C12H22O11	Melibiose*	Others	Saccharides and Alcohols	585-99-9	5289400	6125300	5124800	4910700	5000600	4797400
mws0906	342.131	C16H22O8	Coniferin	Phenolic acids	Phenolic acids	531-29-3	3666500	5093400	5459500	16909000	11915000	19622000
pmb2211	342.288	C19H38N2O3	Cocamidopropyl betaine	Alkaloids	Alkaloids	873943	70958	70267	72511	39197	43054	29478
Lmmn000774	344.111	C15H20O9	Dihydrocaffeoylglucose	Phenolic acids	Phenolic acids	-	801130	1153800	2082500	573650	1439300	821070
mws0609	345.047	C10H12N5O7P	Guanosine 3',5'-cyclic monophosphate	Nucleotides and derivatives	Nucleotides and derivatives	7665-99-8	8533.3	18529	9	39049	8875.6	20144
pmb0801	345.106	C14H19NO9	4-Pyridoxic acid O-hexoside	Others	Vitamin	-	472310	176790	336470	711150	806720	906900
Lmtn000940	346.09	C14H18O10	1-O-(3,4-dihydroxy-5-methoxy-benzoyl)-β-D-glucoside	Phenolic acids	Phenolic acids	-	297590	1756400	267970	1445100	770480	1252300
pmp000261	346.09	C14H18O10	Methyl 6-O-galloyl-β-D-glucopyranoside	Phenolic acids	Phenolic acids	-	191820	222260	348210	64678	230280	157060
pmb0981	347.063	C10H14N5O7P	Adenosine 5'-monophosphate	Nucleotides and derivatives	Nucleotides and derivatives	61-19-8	129190	51720	68227	114130	50411	87223
pmb3093	352.079	C16H16O9	Esculetin 7-O-quinic acid	Lignans and Coumarins	Coumarins	-	13529000	12086000	11861000	10559000	11828000	9771000
mws4108	352.131	C21H20O5	1-Methoxyphaseollin	Others	Others	157226-48-7	95300	42666	48971	75309	45908	65077
pme1816	354.095	C16H18O9	Neochlorogenic acid(5-O-Caffeoylquinic acid)*	Phenolic acids	Phenolic acids	906-33-2	3410700	4448900	3931900	2914600	3781000	3060500
pmp000545	354.095	C16H18O9	4-Caffeoylquinic acid*	Phenolic acids	Phenolic acids	905-99-7	2011200	3039700	2391300	1872400	2296400	2036500
mws0178	354.095	C16H18O9	Chlorogenic acid*	Phenolic acids	Phenolic acids	327-97-9	9437100	15993000	13042000	13053000	14832000	14022000
pmb0890	354.277	C21H38O4	MAG(18:2)	Lipids	Glycerol ester	-	357520	571310	297180	502090	691570	452750
mws5040	355.111	C12H21O11Na	Turanose	Others	Saccharides and Alcohols	547-25-1	786920	971700	1230000	1046400	951900	896470
Zmhn002334	356.111	C16H20O9	6-O-feruloyl-β-glucose	Phenolic acids	Phenolic acids	137887-25-3	3914600	6373900	5067000	4322300	4851600	5242800
mws0096	356.126	C20H20O6	Piperitol	Lignans and Coumarins	Lignans	52151-92-5	63977	79480	69751	120840	114360	177000
pmb0296	356.293	C21H40O4	MAG(18:1)isomer2*	Lipids	Glycerol ester	-	187430	157250	161590	199750	102630	157870
Lmdn004267	358.142	C20H22O6	Epipinoresinol*	Lignans and Coumarins	Lignans	24404-50-0	119110	198490	221620	261900	102290	211920
mws0097	358.142	C20H22O6	Pinoresinol*	Lignans and Coumarins	Lignans	487-36-5	129180	208690	221710	294670	109140	223650
pme0085	360.085	C18H16O8	Rosmarinic acid	Phenolic acids	Phenolic acids	537-15-5	23223	21538	37074	32949	37581	37389
pmb0964	365.17	C16H23N5O5	Isopentenyladenine-7-N-glucoside	Nucleotides and derivatives	Nucleotides and derivatives	-	251750	172640	259110	308630	259750	325440
Lmgp003270	368.074	C16H16O10	Scopoletin??Beta-D-Glucuronide	Lignans and Coumarins	Coumarins	132752-65-9	4762900	6545500	7412500	5224900	6917100	6264200
pma0104	368.09	C20H16O7	N-sinapoylhydroxycoumarin	Lignans and Coumarins	Coumarins	-	80136	75582	77842	111010	101950	106570
mws0179	368.111	C17H20O9	Chlorogenic acid methyl ester*	Phenolic acids	Phenolic acids	29708-87-0	2122200	2148200	3645100	3005000	4306100	3074400
pma3724	368.111	C17H20O9	1-O-Feruloyl quinic acid*	Phenolic acids	Phenolic acids	-	5602000	8187200	7340300	6309000	7608500	7049800
pmb0752	368.111	C17H20O9	3-O-Feruloyl quinic acid	Phenolic acids	Phenolic acids	1899-29-2	741620	679120	897480	1589900	1411400	2186500
Lmbp002255	370.09	C16H18O10	Fraxin	Lignans and Coumarins	Coumarins	524-30-1	182620	231730	243760	118180	127290	159410
Lmbp002309	370.126	C17H22O9	Sinapaldehyde Glucoside	Phenolic acids	Phenolic acids	154461-65-1	178020	222300	272930	99930	137380	157290
Lmbn002160	374.137	C20H22O7	8-hydroxypinoresinol	Lignans and Coumarins	Lignans	81426-17-7	236340	342690	224050	263030	264580	91441
pmp000676	376.137	C16H24O10	Adoxosidic acid	Terpenoids	Monoterpenoids	84375-46-2	15085000	9501900	14605000	11230000	10348000	9618400
mws0232	376.138	C17H20N4O6	Riboflavin	Others	Vitamin	83-88-5	3676700	4060800	3602500	3023900	2787900	2759400
pme3337	383.108	C14H17N5O8	N6-Succinyl Adenosine	Nucleotides and derivatives	Nucleotides and derivatives	4542-23-8	706850	1024100	984470	952920	873280	788080
Lmbp003208	384.106	C17H20O10	fraxidin 8-O-glucoside	Lignans and Coumarins	Coumarins	-	19137000	30017000	31402000	15198000	18370000	19199000
pme1286	384.122	C14H20N6O5S	S-(5'-Adenosy)-L-homocysteine	Amino acids and derivatives	Amino acids and derivatives	979-92-0	18572	13134	8811.4	6037	12551	11045
pmb2940	386.121	C17H22O10	1-O-β-D-Glucopyranosyl sinapate	Phenolic acids	Phenolic acids	78185-48-5	170490	102190	317170	293180	323450	236650
pmn001423	386.194	C19H30O8	Roseoside	Others	Others	54835-70-0	1923800	1868600	2289600	2387300	1875900	1977800
Lmzn001582	388.173	C18H28O9	5'-Glucopyranosyloxyjasmanic acid	Phenolic acids	Phenolic acids	-	15438000	13761000	9056900	12075000	8910400	11281000
pmn001741	390.116	C16H22O11	Oleoside	Terpenoids	Monoterpenoids	178600-68-5	7209600	4174300	6884100	2901600	3819700	2995200
Cmjn004337	402.153	C18H26O10	Benzyl-O-β-D-glucopyranose-β-D-xyranoside	Others	Others	-	249150	177870	235640	211660	331680	300440
pme3007	404.002	C9H14N2O12P2	Uridine 5'-diphosphate	Nucleotides and derivatives	Nucleotides and derivatives	27821-45-0	97784	183840	145570	134720	132870	58580
pmn001738	404.132	C17H24O11	Oleoside 11-methyl ester	Phenolic acids	Phenolic acids	60539-23-3	10102000	11242000	13466000	16370000	10818000	17756000
pmn001659	408.215	C22H32O7	Dehydrocinnzeylanine	Phenolic acids	Phenolic acids	-	214920	87075	131520	27405	62091	65518
Lmhn001773	415.054	C19H13NO10	caffeoylnicotinoyltartaric acid	Phenolic acids	Phenolic acids	-	1155600	1153800	1296400	991550	1215000	1253700
pmn001663	418.163	C22H26O8	Syringaresinol	Lignans and Coumarins	Lignans	21453-69-0	24204	19874	21194	9096.8	15696	12041
mws2523	422.083	C12H23O14P	Trehalose 6-phosphate	Others	Saccharides and Alcohols	4484-88-2	36079	27891	30410	28367	28550	23499
Hmcp005535	424.371	C30H48O	α-Amyrenone*	Terpenoids	Triterpene	638-96-0	374230	333600	392350	565590	558360	580170
Hmcp005697	424.371	C30H48O	δ-Amyrenone*	Terpenoids	Triterpene	-	596560	393880	584080	739090	604910	917790
pmp000436	426.386	C30H50O	Taraxerol	Terpenoids	Triterpene	-	48517	65295	51034	39890	72483	63525
pme2117	427.029	C10H15N5O10P2	Adenosine 5'-Diphosphate	Nucleotides and derivatives	Nucleotides and derivatives	58-64-0	22382	24346	41951	27480	24094	24535
Lmhn002574	432.069	C20H16O11	caffeoylp-Hydroxybenzoyltartaric acid	Phenolic acids	Phenolic acids	-	42495	64027	49605	56687	41446	59812
pmp000413	432.106	C21H20O10	Genistein 8-C-glucoside	Flavonoids	Flavonoid carbonoside	66026-80-0	76306	109550	145510	150400	245540	277460
Lmlp003201	432.106	C21H20O10	5,7,4'-Trihydroxy-8-C-β-D-glucopyranosylflavone	Flavonoids	Flavonoid carbonoside	-	27721	66832	119810	95662	174910	161750
mws2186	434.085	C20H18O11	Avicularin*	Flavonoids	Flavonols	572-30-5	4968600	9870900	6948700	8173200	12292000	9133500
Lmdp003509	434.085	C20H18O11	Quercetin 3-O-β-D-xylopyranoside*	Flavonoids	Flavonols	549-32-6	5652300	12298000	7692500	9605600	12890000	11662000
Cmzn005251	434.121	C21H22O10	6-O-Caffeoylarbutin	Phenolic acids	Phenolic acids	136172-60-6	93822	195380	113370	91937	116030	115090
mws1179	434.121	C21H22O10	Naringenin-7-O-glucoside	Flavonoids	Dihydroflavone	529-55-5	121600	151690	95695	482270	413450	479660
pmb1283	447.215	C18H33N5O6S	L-Glutaminyl-L-valyl-L-valyl-L-cysteine	Amino acids and derivatives	Amino acids and derivatives	-	306460	270350	273520	171510	234490	141450
pme2459	448.101	C21H20O11	Luteolin-7-O-glucoside(Cynaroside)*	Flavonoids	Flavonoid	1268798	2099800	810940	2543500	1458000	6967700	1151200
Hmpp003270	448.101	C21H20O11	Luteolin-4'-O-β-D-glucoside*	Flavonoids	Flavonoid	6920-38-3	6807000	12432000	8573600	10616000	16365000	15724000
Lmlp003531	448.101	C21H20O11	Luteolin 3'-O-β-D-glucoside*	Flavonoids	Flavonoid	5154-41-6	8038000	12932000	10283000	11230000	16614000	15749000
Xmyp005654	448.101	C21H20O11	Kaempferol-4'-O-β-D-glucopyranoside*	Flavonoids	Flavonoid	-	1880800	2311200	3101400	3803300	5434100	4460800
Xmyp005259	448.101	C21H20O11	Quercetin-3-O-a-L-rhamnoside*	Flavonoids	Flavonoid	-	1383700	1789900	1373300	1857500	1038800	1538300
Lmmn004625	450.116	C21H22O11	Dihydrokaempferol-7-O-glucoside*	Flavonoids	Flavonols	-	523430	595050	422810	876270	1647100	1293700
Lmtn002796	450.116	C21H22O11	Aromadendrin 7-glucoside	Terpenoids	Triterpene Saponin	-	44624	36345	38238	96891	108270	111670
HJN086	450.116	C21H22O11	Eriodictyol-O-glucoside*	Flavonoids	Flavonoid	-	154100	133120	134750	287530	494530	367230
Cmzn005999	450.116	C21H22O11	Dunalianoside B*	Phenolic acids	Phenolic acids	-	467740	532980	517800	874010	1308000	1287400
Li512113	452.095	C20H20O12	Maleoyl-caffeoylquinic acid	Phenolic acids	Phenolic acids	-	15925	18374	17979	16579	27631	40436
pmb0876	453.286	C21H44NO7P	LysoPE 16:0*	Lipids	LPE	53862-35-4	1094600	1489300	938950	1003600	774340	956030
pmp001277	453.286	C21H44NO7P	3-{(2-Aminoethoxy)(hydroxy)phosphoryl]oxy}-2-hydroxypropyl palmitate*	Alkaloids	Alkaloids	-	1102900	1412300	962690	1017100	763180	961600
Wmlp007992	454.345	C30H46O3	Betulonic acid	Terpenoids	Triterpene	4481-62-3	2534000	1917900	2077000	2990500	3069000	3128700
HJN110	456.36	C30H48O3	betulinic acid*	Terpenoids	Triterpene	-	8668800	10564000	9229400	9640200	10629000	9790000
mws4053	456.36	C30H48O3	Ursolic acid	Terpenoids	Triterpene	77-52-1	538920	657570	690090	890580	812550	960890
pmn001700	456.36	C30H48O3	24,30-Dihydroxy-12(13)-enolupinol*	Terpenoids	Triterpene	-	7987200	9454900	8562100	8783900	10107000	9135800
pmb0464	457.143	C16H27NO14	Aspartic acid di-O-glucoside	Amino acids and derivatives	Amino acids and derivatives	-	173290	154060	250990	470210	270470	259090
Lmhn003811	458.085	C22H18O11	p-coumaroylcaffeoyltartaric acid isomer3	Phenolic acids	Phenolic acids	-	47908	50690	57099	43231	35674	54476
mad2085	458.085	C22H18O11	Caffeoyl-p-coumaroyltartaric acid	Phenolic acids	Phenolic acids	-	14881	8206.2	17835	44901	45109	75889
pmb2654	461.153	C19H27NO12	Anthranilate O-hexosyl-O-hexoside	Phenolic acids	Phenolic acids	-	415590	435090	320360	1588500	737350	658410
Zmhn002750	462.116	C22H22O11	4-O-(6′-O-glucosylcaffeoyl)-4-hydroxybenzoic acid	Phenolic acids	Phenolic acids	-	5962.9	6765.8	8735.5	48976	24598	47279
pmp000579	462.116	C22H22O11	Diosmetin-7-O-galactoside	Flavonoids	Flavonoid	-	1445300	2410700	3013400	2043900	2914500	2793000
Xmyp005261	464.095	C21H20O12	Quercetin-3-O-β-D-glucopyranoside*	Flavonoids	Flavonoid	-	2110600	3936300	2797500	5765900	7930900	6869500
mws1329	464.095	C21H20O12	Quercetin-7-O-Glucoside*	Flavonoids	Flavonols	491-50-9	10057000	12923000	10686000	20898000	27685000	26881000
pme1598	464.132	C22H24O11	Hesperetin 5-O-glucoside	Flavonoids	Dihydroflavonol	69651-80-5	2565500	4327700	3060000	6000100	10029000	9828200
Lmzp002365	464.132	C22H24O11	Hesperetin-7-O-glucoside	Flavonoids	Flavonoid	31712-49-9	1462700	4507100	1622000	2229000	4088900	3022400
pmb2957	467.098	C24H19O10+	Cyanidin-O-syringic acid	Flavonoids	Anthocyanins	-	13536	10910	9801.7	927840	325230	641550
pmd0130	467.301	C22H46NO7P	LysoPC 14:0	Lipids	LPC	-	9630.9	10319	11081	15156	4538.1	94774
Hmjn008136	470.34	C30H46O4	Camaldulenic acid*	Terpenoids	Triterpene	71850-15-2	7363400	6501300	9759400	12043000	14957000	16814000
pmn001704	470.34	C30H46O4	2,3-Dihydroxy 5(6),12(13)diene ursolic acid*	Terpenoids	Triterpene	-	375630	336660	508120	619090	813270	929230
pmn001706	472.355	C30H48O4	2-Hydroxyoleanolic acid*	Terpenoids	Triterpene	26707-60-8	9832900	12125000	10112000	9367900	11468000	12565000
pmn001705	472.355	C30H48O4	3,24-Dihydroxy-17,21-semiacetal-12(13)oleanolic fruit*	Terpenoids	Triterpene	-	11817000	12247000	10192000	10769000	11392000	12668000
Hmjn005621	472.355	C30H48O4	Corosolic acid	Terpenoids	Terpene	4547-24-4	32652000	13406000	22915000	29263000	25551000	27372000
Lmhp008801	475.27	C23H42NO7P	LysoPE 18:3*	Lipids	LPE	-	424220	779410	384980	699360	443170	296980
pmb0881	477.286	C23H44NO7P	LysoPE 18:2*	Lipids	LPE	-	510820	936630	403060	274650	274380	212960
Lmyp004444	478.111	C22H22O12	Tricetin??4'-methyl??ether-3'-O-β-D-glucoside*	Flavonoids	Flavonols	-	354200	479070	493500	1045300	1306000	1956900
Hmcp002207	478.111	C22H22O12	Isorhamnetin-7-O-glucoside*	Flavonoids	Flavonols	-	408590	402830	526570	1116600	1517200	1919700
Hmpp003242	478.111	C22H22O12	Isorhamnetin-3-O-glucoside*	Flavonoids	Flavonols	-	421420	421440	512320	1184600	1423500	1957300
Hmbp002025	478.148	C23H26O11	Calceorioside D*	Others	Others	-	772630	1817300	1070400	1659500	1522400	1015100
mws4169	478.148	C23H26O11	Calceorioside B*	Phenolic acids	Phenolic acids	105471-98-5	180350	9	268920	830270	1192600	719090
pmp000681	478.148	C23H26O11	Calceolarioside A*	Phenolic acids	Phenolic acids	84744-28-5	534670	1034100	773620	950500	826260	627380
pmp001280	479.301	C23H46NO7P	3-{[(2-Aminoethoxy)(hydroxy)phosphoryl]oxy}-2-hydroxypropyl-9,12-octadecenoate*	Alkaloids	Alkaloids	-	106830	237360	75900	52705	36312	56261
mws0289	479.301	C23H46NO7P	LysoPE 18:1*	Lipids	LPE	89576-29-4	137570	257320	88814	48388	39773	57350
HJN104	482.106	C21H22O13	Dihydromyricetin-O-glucoside	Flavonoids	Dihydroflavonol	-	89404	34763	65044	111130	80528	141800
pmb3072	482.142	C22H26O12	3-O-p-coumaroyl shikimic acid O-hexoside	Phenolic acids	Phenolic acids	-	339580	351510	526040	522760	498250	767400
pmn001707	486.335	C30H46O5	Quillaic acid	Phenolic acids	Phenolic acids	631-01-6	593690	492310	755800	1146200	1327700	1398000
Li512114	486.371	C31H50O4	Ursolic acid-OCH3	Terpenoids	Triterpene	-	13748	19594	22392	35494	57180	62046
Hmjn003948	488.35	C30H48O5	Madasiatic acid	Terpenoids	Triterpene	26532-66-1	10784000	8508900	10405000	14017000	13906000	13425000
Lmmn003398	490.111	C23H22O12	Kaempferol acetyl-glucoside*	Flavonoids	Flavonols	-	435510	1391000	718970	657220	1705600	988140
pme0443	493.135	C23H25O12+	Malvidin-3-O-galactoside (Primulin)	Flavonoids	Anthocyanins	30113-37-2	27005	16981	20790	51030	63234	49953
pmb0790	493.18	C20H31NO13	Pyridoxine di-O-hexoside	Others	Vitamin	-	23693	14165	15291	58194	36999	65138
pmp001270	493.317	C24H48NO7P	LysoPC 16:1*	Lipids	LPC	-	19487	21485	26038	25368	24461	224810
pmb0855	495.332	C24H50NO7P	LysoPC 16:0	Lipids	LPC	17364-16-8	7672600	10463000	6461500	9366000	7706600	12722000
pmb3061	500.153	C22H28O13	5-O-p-Coumaroyl quinic acid O-hexoside	Phenolic acids	Phenolic acids	-	630530	537680	576000	389370	426420	595350
pmb3064	500.153	C22H28O13	3-O-p-coumaroyl quinic acid O-hexoside	Phenolic acids	Phenolic acids	-	525360	555110	463460	392900	396510	467700
mws1589	504.169	C18H32O16	Panose*	Others	Saccharides and Alcohols	33401-87-5	490250	359900	389320	283590	194520	278490
pme0500	504.169	C18H32O16	D-(+)-Melezitose*	Others	Saccharides and Alcohols	597-12-6	231060	234620	180420	181950	122570	157000
Hmln002199	506.106	C23H22O13	Quercetin-3-O-(6''-O-acetyl)-galactoside	Flavonoids	Flavonols	-	1626100	2040600	3218900	2294500	4047800	2983000
pmb0803	507.174	C24H29NO11	Pyridoxine O-feruloyl hexoside	Others	Vitamin	-	21280	3989.3	9	26421	23054	35352
Lmgp004518	512.132	C26H24O11	Caffeoylferuloylshikimic??acid	Phenolic acids	Phenolic acids	-	13354	19390	21383	42249	38125	40044
mws1584	516.127	C25H24O12	Cynarin*	Phenolic acids	Phenolic acids	30964-13-7	774750	1171500	927930	1488700	1250600	1703200
Zmhn00785	516.169	C19H32O16	Di-O-Glucose-quinic acid	Phenolic acids	Phenolic acids	-	1326400	1366800	1677100	1007000	1223600	928190
pmp001279	517.313	C21H48N3O9P	Bis(N,N-diethylethanaminium)-2-acetamido-1,5-anhydro-2-deoxy-1-[-hydroxy(phosphonato)methyl]-D-glucitol	Alkaloids	Alkaloids	-	202520	241680	140180	200360	198550	246520
pmb0865	517.317	C26H48NO7P	LysoPC 18:3	Lipids	LPC	-	9736100	9087200	7705500	12726000	9004600	11766000
pmp001251	519.332	C26H50NO7P	LysoPC 18:2	Lipids	LPC	-	5548900	6168000	4523900	4982400	3469200	4733000
pmn001644	520.085	C23H20O14	Quercetin-3-O-(2''-acetyl)-β-D-glucuronide	Flavonoids	Flavonols	-	8955.6	64320	93515	58618	143520	193890
pmb3013	520.122	C24H24O13	Isorhamnetin-O-acetyl-hexoside	Flavonoids	Flavonols	-	57986	53395	38315	81283	167050	257000
pmn001378	520.194	C26H32O11	Terpineol monO-glucoside	Lignans and Coumarins	Lignans	-	6211900	10074000	6771700	4216200	3968000	4148200
pmp000682	520.194	C26H32O11	Matairesinoside	Lignans and Coumarins	Lignans	23202-85-9	18292	17302	9779.4	25411	16411	20946
pmp001281	521.348	C26H52NO7P	LysoPC 18:1	Lipids	LPC	-	2482300	3599400	1703000	1367200	1019800	2329300
HJN083	522.21	C26H34O11	Lariciresinol glucopyranoside	Others	Others	-	249200	387220	289900	178740	118660	192370
mws0126	523.364	C26H54NO7P	LysoPC 18:0	Lipids	LPC	19420-57-6	265270	295000	233340	349980	291630	545540
pmn001742	524.189	C25H32O12	Ligustrosidic(Nuezhenide)	Others	Others	-	810700	1365900	817370	310760	337960	288090
Lmjp003731	530.142	C26H26O12	3,4-O-Dicaffeoylquinic Acid Methyl Ester*	Others	Others	-	18115	23932	21316	43556	44251	50192
Lmjp003822	530.142	C26H26O12	3,5-Dicaffeoylquinic Acid Methyl Ester*	Others	Others	159934-13-1	13866	23713	22434	48395	35314	47535
pmb2833	530.164	C23H30O14	3-O-Feruloyl quinic acid glucoside*	Phenolic acids	Phenolic acids	-	28851	23852	34720	47138	32425	49049
pmb2554	530.164	C23H30O14	5-O-Feruloyl quinic acid glucoside*	Phenolic acids	Phenolic acids	-	34110	20061	34722	32698	31928	44839
Lmbn001181	532.143	C22H28O15	fraxetin diglucoside	Lignans and Coumarins	Coumarins	-	275250	286830	246620	607090	513420	801360
Hmln002402	534.101	C24H22O14	Kaempferol-3-O-(6''-malonyl)-galactoside*	Flavonoids	Flavonols	-	369890	702820	398750	601950	928300	726360
pmp000587	534.101	C24H22O14	Luteolin-7-O-(6'-O-malonyl)-β-D-glucoside*	Flavonoids	Flavonoid	-	2520.4	3437.9	3117.2	2193.8	4397.3	2818.2
HJAP065	534.101	C24H22O14	Kaempferol-malonyl-3-O-glucoside*	Flavonoids	Flavonoid	-	1555300	2490200	1593800	2547200	4642600	4094500
pmn001375	536.189	C26H32O12	1-Hydroxyterpinin monO-glucoside	Lignans and Coumarins	Lignans	-	1642600	1776900	1888300	1150700	1323900	792390
Lmdn001925	538.205	C26H34O12	Olivil-4′-O-β-D-glucoside	Lignans and Coumarins	Lignans	76880-93-8	31304	31569	39602	52177	42335	85230
mws1586	540.184	C25H32O13	Oleuropein	Others	Others	32619-42-4	468180	527010	789170	619950	579900	572820
pmp001274	541.317	C28H48NO7P	2-Hydroxy-5,8,11,14,17-icosapentaenoyloxy]propyl-2-(trimethylammonio)ethyl phosphate	Alkaloids	Alkaloids	-	64962	112610	63662	38075	56213	70286
pmb3059	544.128	C19H28O18	Quinic acid O-di-glucuronic acid	Others	Others	-	50372	36929	38586	61567	94608	102960
Hmln002189	550.096	C24H22O15	Quercetin-3-O-(6''-O-malonyl)-galactoside*	Flavonoids	Flavonols	-	4197200	8423700	5113100	6656100	10228000	8136400
pmp000589	550.096	C24H22O15	Quercetin-7-O-(6'-O-malonyl)-β-D-glucoside*	Flavonoids	Flavonols	-	5558000	8687400	7516500	9251000	14115000	10838000
Hmln002355	550.205	C27H34O12	5'-Methoxymatairesinoside	Lignans and Coumarins	Lignans	1691201-82-7	107960	123330	80347	123610	124730	157600
pmn001746	554.164	C25H30O14	Ligustrosidic acid	Others	Others	96382-89-7	10377	11246	23316	53827	28524	38502
pma0702	557.274	C29H39N3O8	N,N'-Bis(Sinapoyl)Spermidine	Alkaloids	Phenolamine	-	96708	108760	125910	92662	134090	120580
Zmhp005139	564.112	C25H24O15	Tamarixetin-malonylhexoside*	Flavonoids	Flavonoid	-	412630	525620	399370	1140600	1509500	1555100
HJAP064	564.112	C25H24O15	Isorhamnetin O-malonylglucoside*	Flavonoids	Flavonoid	-	432510	501400	304740	1070500	1475900	1555600
pmb2922	566.055	C15H24N2O17P2	Uridine 5'-diphospho-D-glucose	Nucleotides and derivatives	Nucleotides and derivatives	133-89-1	298970	267360	154640	215440	155120	239740
Rfmb26203	580.216	C28H36O13	Syringaresinol-Hex	Lignans and Coumarins	Lignans	-	2698900	2101500	2343300	2097000	2897000	2427500
Rfmb056	592.216	C29H36O13	Medioresinol-acetylglucoside	Lignans and Coumarins	Lignans	-	32798	49416	31747	53232	54156	65583
Lmlp006927	592.269	C35H36N4O5	2-[4-(2-{[3-(2-Amino-2-oxoethyl)-5-methoxy-2-methyl-1H-indol-1-yl]methyl } phenoxy)butoxy]-N-(pyridin-3-yl)benzamide	Alkaloids	Alkaloids	-	1158000	1539100	1105000	1516400	1923700	1348400
Xmyn005410	594.158	C27H30O15	Kaempferol-3-O-rutinoside*	Flavonoids	Flavonoid	-	5549100	8741300	4477300	5417300	5757000	5287000
pmp001106	594.158	C27H30O15	Vitexin-2-O-D-glucopyranoside*	Flavonoids	Flavonoid carbonoside	-	153380	147190	258760	219840	441600	254180
Lmjp002867	594.158	C27H30O15	Kaempferol 3-O-β-D-neohesperidoside*	Flavonoids	Flavonols	32602-81-6	2122600	3202600	2269600	2635200	3135000	2527500
Lmsn002815	594.158	C27H30O15	Kaempferol-3-O-rhamnoglycoside*	Flavonoids	Flavonoid	-	4867700	8087900	4623400	5508900	5605500	4993700
mws1073	594.158	C27H30O15	Apigenin 6,8-C-diglucoside*	Flavonoids	Flavonoid	23666-13-9	1137900	868610	1737800	1152000	1359700	1689500
Lmpp003789	595.145	C30H27O13+	Cyanidin-3-O-(6''-p-Coumaroylglucoside)	Flavonoids	Anthocyanins	-	2015400	2998900	2261400	2315800	2766300	2393100
Lmjp002596	596.138	C26H28O16	Quercetin 3-O-β-D-xylopyranosyl(1→2)-β-D-galactopyranoside*	Flavonoids	Flavonols	-	1628400	3521800	1998500	2456400	3298600	2809700
Hmbp001825	596.138	C26H28O16	Quercetin-3-sambubioside*	Flavonoids	Flavonols	83048-35-5	1631500	3690800	2193600	2550200	3519600	3050600
Lmpp003977	609.161	C31H29O13+	Peonidin-3-(6''-p-Coumaroylglucoside)	Flavonoids	Anthocyanins	-	17928	29021	39153	38891	32220	27127
Hmmp002336	610.132	C30H26O14	Quercetin-O-feruloyl-Pentoside	Flavonoids	Flavonols	-	6738500	9502500	7413600	8182900	9182100	8618200
mws0059	610.153	C27H30O16	Quercetin-3-O-rutinoside (Rutin)*	Flavonoids	Flavonols	153-18-4	1041500	1033200	1045900	1156300	1560200	1412400
pmn001583	610.153	C27H30O16	Quercetin-3-O-robinobioside*	Flavonoids	Flavonols	52525-35-6	1048200	963860	755980	901850	1288600	1049600
Lmpp003662	611.14	C30H27O14+	Delphinidin-3-O-(6''-p-Coumaroylglucoside)	Flavonoids	Anthocyanins	-	6810400	8985300	6852500	7111600	8094400	8221500
Lmyp003873	616.106	C28H24O16	Quercetin 3-O-(2″-galloyl)-β-D-glucopyranoside	Flavonoids	Flavonoid	69624-79-9	447280	403110	494440	114430	289830	247610
Rfmb26201	622.226	C30H38O14	Syringaresinol-aceGlu	Lignans and Coumarins	Lignans	-	131210	147840	99259	139100	191910	116920
Lmhp003217	624.169	C28H32O16	2'-Hydoxy,5-methoxy Genistein-O-rhamnosyl-glucoside*	Flavonoids	Isoflavones	-	1108200	1596300	1364700	1553400	1946700	1766300
HJAP022	624.169	C28H32O16	Chrysoeriol-C-glucoside-C-glucoside	Flavonoids	Flavonoid	-	356400	360400	339420	128050	308360	169740
Lmmp002463	624.169	C28H32O16	Sexangularetin 3-glucoside-7-rhamnoside*	Flavonoids	Flavonols	-	1021700	1386700	1492200	1527000	1838600	1803900
Xmyp005746	624.169	C28H32O16	Isorhamnetin-3-O-rutinoside*	Flavonoids	Flavonoid	-	957400	1362200	1188900	1417600	1882400	1674700
Hmln002149	624.205	C29H36O15	Acteoside*	Phenolic acids	Phenolic acids	61276-17-3	761940	1757000	1130400	1714400	1502400	1029200
Lmpp003815	625.156	C31H29O14+	Petunidin-3-(6''-p-Coumaroylglucoside)	Flavonoids	Anthocyanins	-	1048700	1437200	1340600	1304200	1720200	1676400
pmp001311	626.148	C27H30O17	6-Hydroxykaempferol-7,6-O-Diglucoside	Flavonoids	Flavonols	-	2125700	1629100	2175800	5942400	8246200	10068000
pma2088	626.148	C27H30O17	Quercetin-3,4'-O-di-β-glucoside	Flavonoids	Flavonols	29125-80-2	33767	69037	62774	20186	47165	31095
Lmhp002613	626.148	C27H30O17	Myricetin-O-glucoside-rhamnoside	Flavonoids	Flavonols	-	342680	160450	557030	254730	255400	378580
pmf0116	627.156	C27H31O17+	Delphinidin-3,5-O-diglucoside	Flavonoids	Anthocyanins	17670-06-3	19145	9133.2	11413	14600	18224	13396
Hmcp001578	640.164	C28H32O17	Isorhamnetin-O-Hexoside-O-Hexoside	Flavonoids	Flavonols	-	688140	362530	881540	965020	1345400	1776000
mws1506	640.2	C29H36O16	Plantamajoside	Phenolic acids	Phenolic acids	104777-68-6	1585100	1050500	1059300	809750	821550	909260
pmb2653	650.227	C24H42O20	D(+)-Melezitose O-rhamnoside	Others	Saccharides and Alcohols	-	38620	62316	49503	266490	24916	81566
pme1786	655.187	C29H35O17+	Malvidin-3,5-O-diglucoside (Malvin)	Flavonoids	Anthocyanins	-	6505.5	11343	15002	14622	11877	8915.5
pmb0530	663.109	C21H27N7O14P2	Nicotinic acid adenine dinucleotide	Nucleotides and derivatives	Nucleotides and derivatives	53-84-9	365640	367950	334880	168510	67836	141000
mws1153	666.216	C31H38O16	2'-Acetylacteoside	Phenolic acids	Phenolic acids	94492-24-7	39194	127370	74668	171240	127970	75033
mws4163	666.222	C24H42O21	1,1-Kestotetraose*	Others	Saccharides and Alcohols	13133-07-8	823890	778490	886420	774020	797830	832630
pmp001275	671.409	C31H61O14N	3-Hydroxypropyl palmitate glc-glucosamine	Alkaloids	Alkaloids	-	2749200	2162700	2292900	2431500	3608900	3354000
pmp000449	676.248	C32H40N2O14	2'-O-β-D-Glucopyranosyl-11-hydroxy vincoside lactam	Alkaloids	Plumerane	-	63938	89322	135400	104780	69299	106680
pmp001276	676.367	C33H56O14	2,3-Dihydroxypropyl-9,12,15-octadecatrienoate-hexose-hexose	Lipids	Free fatty acids	-	1837100	1632500	1492500	2272700	2913400	2189400
Lmgn002250	678.18	C31H34O17	Dicaffeoylquinic acid-glucoside	Phenolic acids	Phenolic acids	-	2421400	1426600	2365700	2760600	3093200	2997100
pmp001271	678.383	C33H58O14	2,3-Dihydroxypropyl-9,12-octadecadienoate-hexose-hexose	Lipids	Free fatty acids	-	59768	59708	59816	122850	78980	133160
pmn001370	682.247	C32H42O16	Pinoresinol diglucoside	Lignans and Coumarins	Lignans	63902-38-5	186300	168540	157970	280200	242460	296260
Lmgn002253	696.19	C31H36O18	SyringoylcaffeoylQuinic acid O-glucose	Phenolic acids	Phenolic acids	-	1154900	1050000	1378100	1093400	1326900	1258800
pmn001369	698.242	C32H42O17	1-Hydroxypineolin Diglucoside	Lignans and Coumarins	Lignans	-	464560	392600	235740	335600	293860	321770
pmn001744	702.237	C31H42O18	Neonuezhenide	Others	Others	96382-91-1	22882000	12589000	19686000	30255000	27187000	28523000
pmb0709	712.149	C30H32O20	Quercetin-7-O-malonylhexosyl-hexoside	Flavonoids	Flavonols	-	513350	575490	650920	2661100	2621600	2653200
pmn001372	712.258	C33H44O17	Mesolipin diglucoside	Lignans and Coumarins	Lignans	-	205120	93996	155380	245880	298910	293310
Lmzn001953	720.169	C36H32O16	Caffeic acid tetramer	Phenolic acids	Phenolic acids	-	30378	17290	33003	30256	47367	42510
pme2651	743.075	C21H28N7O17P3	NADP (Nicotinamide adenine dinucleotide phosphate)	Nucleotides and derivatives	Nucleotides and derivatives	53-59-8	121870	95059	102510	88472	46951	79579
Lmcp004347	743.182	C35H35O18+	Cyanidin-3-O-(6''-O-caffeoyl-2''-O-xylosyl)glucoside	Flavonoids	Anthocyanins	-	16564	4635.2	19850	8523.6	15922	17234
Zmmp003591	757.219	C33H41O20+	Delphinidin-3-p-coumaroylrutinoside	Flavonoids	Anthocyanins	-	276190	156970	450100	252590	256820	319590
Zmmp003779	771.214	C37H39O18+	Petunidin-3-p-coumaroylrutinoside	Flavonoids	Anthocyanins	-	83666	149270	89450	76772	52372	57746
pmp001314	772.206	C33H40O21	6-Hydroxykaempferol-3-O-rutin-6-O-glucoside*	Flavonoids	Flavonols	-	196840	210170	140490	387870	472750	458370
Lmmp002334	772.206	C33H40O21	Quercetin-glucoside-glucoside-rhamnoside*	Flavonoids	Flavonols	-	6398200	5687300	4815500	14730000	14828000	16441000
Zmqp002952	773.213	C33H41O21+	Delphinidin-3-O-rutinoside-7-O-glucoside	Flavonoids	Anthocyanins	-	2427000	2557700	3018300	5342000	5838300	5873400
Hmmp006067	780.466	C42H68O13	Oleanolic acid-O-Hexoside-O-Hexoside	Terpenoids	Triterpene Saponin	-	363980	234120	266810	881750	853980	1181200
Zmcp002839	789.208	C33H41O22+	Delphinidin-3,5,3'-triglucoside	Flavonoids	Anthocyanins	-	8718.8	6566.2	9202.6	24028	20396	43912
Lmdn000248	828.275	C30H52O26	Verbascose	Others	Saccharides and Alcohols	546-62-3	294350	201150	199340	142920	106230	192970
Zmmp003631	917.272	C43H49O22+	Peonidin-3-p-coumaroylrutinoside-5-glucoside	Flavonoids	Anthocyanins	-	43818	33942	54551	56612	48766	45116
Lmwp004293	934.238	C42H46O24	Quercetin-3-O-(p-coumaryl)-sophoroside-7-O-glucoside	Flavonoids	Flavonols	-	33393	59178	47856	25326	38028	29331
CWJP001293	935.245	C42H47O24+	Cyanidin-3-O-(6''-O-caffeoyl)sophoroside-7-O-glucoside	Flavonoids	Anthocyanins	-	1590.7	648.13	1908.6	4162.9	3189.1	5124.4
Lmmn004491	988.488	C48H76O21	medicagenic acid 3-O-β-D-Glc-(1,6)-β-D-Glc-(1,3)-β-D-Glc	Terpenoids	Triterpene Saponin	-	1336200	1939500	2393200	2010700	1618600	1855600
CWJP002576	1167.28	C54H55O29+	Cyanidin-3-O-di-caffeoylglucoside-5-O-malonyl-glucoside	Flavonoids	Anthocyanins	-	11722	13933	18642	14038	19193	20409
