# Supplementary material for: Transcriptomic and metabolomic analysis of autumn leaf color change in Fraxinus angustifolia
Source: PeerJ. 2023 May 12;11:e15319. doi: 10.7717/peerj.15319 (PMC10184661; doi:10.7717/peerj.15319)
Supplement: Supplemental Information 7 [file peerj-11-15319-s007.xlsx]

## Sheet: Sheet1
Sample Name	Assay Name	Assay Role	Cq	Threshold Setting	Cq Threshold	Baseline Setting	Baseline Start
CHI3-1-1	CHI3	Unknown	28.84	Manual	0.02	Auto	1
CHI3-1-2	CHI3	Unknown	28.82	Manual	0.02	Auto	1
CHI3-1-3	CHI3	Unknown	28.75	Manual	0.02	Auto	1
CHI3-2-1	CHI3	Unknown	23.85	Manual	0.02	Auto	1
CHI3-2-2	CHI3	Unknown	23.71	Manual	0.02	Auto	1
CHI3-2-3	CHI3	Unknown	23.75	Manual	0.02	Auto	1
CHI3-1-1	18s	Unknown	20.88	Manual	0.02	Auto	1
CHI3-1-2	18s	Unknown	20.65	Manual	0.02	Auto	1
CHI3-1-3	18s	Unknown	20.94	Manual	0.02	Auto	1
CHI3-2-1	18s	Unknown	18.94	Manual	0.02	Auto	1
CHI3-2-2	18s	Unknown	18.74	Manual	0.02	Auto	1
CHI3-2-3	18s	Unknown	19.75	Manual	0.02	Auto	1
CHI-1-1	CHI	Unknown	27.44	Manual	0.02	Auto	1
CHI-1-2	CHI	Unknown	27.16	Manual	0.02	Auto	1
CHI-1-3	CHI	Unknown	27.65	Manual	0.02	Auto	1
CHI-2-1	CHI	Unknown	25.1	Manual	0.02	Auto	1
CHI-2-2	CHI	Unknown	25.33	Manual	0.02	Auto	1
CHI-2-3	CHI	Unknown	26.14	Manual	0.02	Auto	1
CHI-1-1	18s	Unknown	18.65	Manual	0.02	Auto	1
CHI-1-2	18s	Unknown	18.57	Manual	0.02	Auto	1
CHI-1-3	18s	Unknown	18.71	Manual	0.02	Auto	1
CHI-2-1	18s	Unknown	19.11	Manual	0.02	Auto	1
CHI-2-2	18s	Unknown	19.15	Manual	0.02	Auto	1
CHI-2-3	18s	Unknown	19.12	Manual	0.02	Auto	1
PAL-1-1	PAL	Unknown	29.03	Manual	0.02	Auto	1
PAL-1-2	PAL	Unknown	27.88	Manual	0.02	Auto	1
PAL-1-3	PAL	Unknown	28.17	Manual	0.02	Auto	1
PAL-2-1	PAL	Unknown	24.877	Manual	0.02	Auto	1
PAL-2-2	PAL	Unknown	24.948	Manual	0.02	Auto	1
PAL-2-3	PAL	Unknown	24.933	Manual	0.02	Auto	1
PAL-1-1	18s	Unknown	20	Manual	0.02	Auto	1
PAL-1-2	18s	Unknown	19	Manual	0.02	Auto	1
PAL-1-3	18s	Unknown	18.97	Manual	0.02	Auto	1
PAL-2-1	18s	Unknown	19.12	Manual	0.02	Auto	1
PAL-2-2	18s	Unknown	19.13	Manual	0.02	Auto	1
PAL-2-3	18s	Unknown	19.32	Manual	0.02	Auto	1
4CL3-1-1	4CL3	Unknown	28.08	Manual	0.02	Auto	1
4CL3-1-2	4CL3	Unknown	27.8	Manual	0.02	Auto	1
4CL3-1-3	4CL3	Unknown	27.94	Manual	0.02	Auto	1
4CL3-2-1	4CL3	Unknown	27.1	Manual	0.02	Auto	1
4CL3-2-2	4CL3	Unknown	27.06	Manual	0.02	Auto	1
4CL3-2-3	4CL3	Unknown	27.23	Manual	0.02	Auto	1
4CL3-1-1	18s	Unknown	18.99	Manual	0.02	Auto	1
4CL3-1-2	18s	Unknown	18.99	Manual	0.02	Auto	1
4CL3-1-3	18s	Unknown	18.81	Manual	0.02	Auto	1
4CL3-2-1	18s	Unknown	20.97	Manual	0.02	Auto	1
4CL3-2-2	18s	Unknown	20.76	Manual	0.02	Auto	1
4CL3-2-3	18s	Unknown	20.98	Manual	0.02	Auto	1
PALA-1-1	PALA	Unknown	28.06	Manual	0.02	Auto	1
PALA-1-2	PALA	Unknown	28.15	Manual	0.02	Auto	1
PALA-1-3	PALA	Unknown	27.99	Manual	0.02	Auto	1
PALA-2-1	PALA	Unknown	25.72	Manual	0.02	Auto	1
PALA-2-2	PALA	Unknown	25.64	Manual	0.02	Auto	1
PALA-2-3	PALA	Unknown	25.778	Manual	0.02	Auto	1
PALA-1-1	18s	Unknown	18.71	Manual	0.02	Auto	1
PALA-1-2	18s	Unknown	18.81	Manual	0.02	Auto	1
PALA-1-3	18s	Unknown	18.99	Manual	0.02	Auto	1
PALA-2-1	18s	Unknown	18.99	Manual	0.02	Auto	1
PALA-2-2	18s	Unknown	19.07	Manual	0.02	Auto	1
PALA-2-3	18s	Unknown	19.06	Manual	0.02	Auto	1
TIF3H1-1-1	TIF3H1	Unknown	28.16	Manual	0.02	Auto	1
TIF3H1-1-2	TIF3H1	Unknown	28.42	Manual	0.02	Auto	1
TIF3H1-1-3	TIF3H1	Unknown	28.04	Manual	0.02	Auto	1
TIF3H1-2-1	TIF3H1	Unknown	25.91	Manual	0.02	Auto	1
TIF3H1-2-2	TIF3H1	Unknown	26.08	Manual	0.02	Auto	1
TIF3H1-2-3	TIF3H1	Unknown	25.77	Manual	0.02	Auto	1
TIF3H1-1-1	18s	Unknown	18.95	Manual	0.02	Auto	1
TIF3H1-1-2	18s	Unknown	19.12	Manual	0.02	Auto	1
TIF3H1-1-3	18s	Unknown	19.07	Manual	0.02	Auto	1
TIF3H1-2-1	18s	Unknown	18.84	Manual	0.02	Auto	1
TIF3H1-2-2	18s	Unknown	18.87	Manual	0.02	Auto	1
TIF3H1-2-3	18s	Unknown	18.91	Manual	0.02	Auto	1
DFRA-1-1	DFRA	Unknown	28.16	Manual	0.02	Auto	1
DFRA-1-2	DFRA	Unknown	27.23	Manual	0.02	Auto	1
DFRA-1-3	DFRA	Unknown	28.01	Manual	0.02	Auto	1
DFRA-2-1	DFRA	Unknown	24.95	Manual	0.02	Auto	1
DFRA-2-2	DFRA	Unknown	24.85	Manual	0.02	Auto	1
DFRA-2-3	DFRA	Unknown	24.83	Manual	0.02	Auto	1
DFRA-1-1	18s	Unknown	18.99	Manual	0.02	Auto	1
DFRA-1-2	18s	Unknown	17.91	Manual	0.02	Auto	1
DFRA-1-3	18s	Unknown	19.01	Manual	0.02	Auto	1
DFRA-2-1	18s	Unknown	19.14	Manual	0.02	Auto	1
DFRA-2-2	18s	Unknown	19.07	Manual	0.02	Auto	1
DFRA-2-3	18s	Unknown	18.99	Manual	0.02	Auto	1
UGT79B1-1-1	UGT79B1	Unknown	28.16	Manual	0.02	Auto	1
UGT79B1-1-2	UGT79B1	Unknown	28.45	Manual	0.02	Auto	1
UGT79B1-1-3	UGT79B1	Unknown	27.97	Manual	0.02	Auto	1
UGT79B1-2-1	UGT79B1	Unknown	24.7	Manual	0.02	Auto	1
UGT79B1-2-2	UGT79B1	Unknown	25.6	Manual	0.02	Auto	1
UGT79B1-2-3	UGT79B1	Unknown	25.81	Manual	0.02	Auto	1
UGT79B1-1-1	18s	Unknown	18.58	Manual	0.02	Auto	1
UGT79B1-1-2	18s	Unknown	18.66	Manual	0.02	Auto	1
UGT79B1-1-3	18s	Unknown	18.69	Manual	0.02	Auto	1
UGT79B1-2-1	18s	Unknown	17.71	Manual	0.02	Auto	1
UGT79B1-2-2	18s	Unknown	18.73	Manual	0.02	Auto	1
UGT79B1-2-3	18s	Unknown	18.86	Manual	0.02	Auto	1
BZ1-1-1	BZ1	Unknown	29.16	Manual	0.02	Auto	1
BZ1-1-2	BZ1	Unknown	28.35	Manual	0.02	Auto	1
BZ1-1-3	BZ1	Unknown	28.03	Manual	0.02	Auto	1
BZ1-2-1	BZ1	Unknown	25.28	Manual	0.02	Auto	1
BZ1-2-2	BZ1	Unknown	25.39	Manual	0.02	Auto	1
BZ1-2-3	BZ1	Unknown	25.31	Manual	0.02	Auto	1
BZ1-1-1	18s	Unknown	19.56	Manual	0.02	Auto	1
BZ1-1-2	18s	Unknown	18.67	Manual	0.02	Auto	1
BZ1-1-3	18s	Unknown	18.71	Manual	0.02	Auto	1
BZ1-2-1	18s	Unknown	18.72	Manual	0.02	Auto	1
BZ1-2-2	18s	Unknown	18.69	Manual	0.02	Auto	1
BZ1-2-3	18s	Unknown	18.72	Manual	0.02	Auto	1
